# Supplementary material for: Temporal trends in antithrombotic treatment of real-world UK patients with newly diagnosed atrial fibrillation: findings from the GARFIELD-AF registry
Source: PubMed Central journal article supplement — BMJ Open. 2018 Jan 13;8(1):e018905. doi: 10.1136/bmjopen-2017-018905 (PMC5781154; doi:10.1136/bmjopen-2017-018905), 2018-01-13
Supplement: bmjopen-2017-018905.draft_revisions.pdf [file bmjopen-2017-018905.draft_revisions.pdf]

# BMJ Open

BMJ Open is committed to open peer review. As part of this commitment we make the peer review history of every article we publish publicly available.

When an article is published we post the peer reviewers' comments and the authors' responses online. We also post the versions of the paper that were used during peer review. These are the versions that the peer review comments apply to.

The versions of the paper that follow are the versions that were submitted during the peer review process. They are not the versions of record or the final published versions. They should not be cited or distributed as the published version of this manuscript.

BMJ Open is an open access journal and the full, final, typeset and author-corrected version of record of the manuscript is available on our site with no access controls, subscription charges or pay-per-view fees (<http://bmjopen.bmj.com>).

If you have any questions on BMJ Open's open peer review process please email [editorial.bmjopen@bmj.com](mailto:editorial.bmjopen@bmj.com)

# BMJ Open

## Temporal trends in antithrombotic treatment of real-world UK patients with newly diagnosed atrial fibrillation: findings from the GARFIELD-AF registry

|                                 |                                                                                                                                                                                                                          |
|---------------------------------|--------------------------------------------------------------------------------------------------------------------------------------------------------------------------------------------------------------------------|
| Journal:                        | <i>BMJ Open</i>                                                                                                                                                                                                          |
| Manuscript ID                   | bmjopen-2017-018905                                                                                                                                                                                                      |
| Article Type:                   | Research                                                                                                                                                                                                                 |
| Date Submitted by the Author:   | 01-Aug-2017                                                                                                                                                                                                              |
| Complete List of Authors:       | Apenteng, Patricia; University of Warwick Warwick Medical School, Gao, Haiyan; Thrombosis Research Institute<br>Hobbs, Richard; University of Oxford<br>Fitzmaurice, David; University of Warwick Warwick Medical School |
| <b>Primary Subject Heading</b>: | Cardiovascular medicine                                                                                                                                                                                                  |
| Secondary Subject Heading:      | Cardiovascular medicine                                                                                                                                                                                                  |
| Keywords:                       | atrial fibrillation, antithrombotic therapy, Anticoagulation < HAEMATOLOGY, newly diagnosed, stroke prophylaxis                                                                                                          |
|                                 |                                                                                                                                                                                                                          |

SCHOLARONE™  
Manuscripts

1  
2  
3 **Temporal trends in antithrombotic treatment of real-world UK patients with newly diagnosed**  
4 **atrial fibrillation: findings from the GARFIELD-AF registry**  
5  
6  
7

8 **Authors**  
9

10 Patricia N Apenteng<sup>1</sup>, Haiyan Gao<sup>2</sup>, F D Richard Hobbs<sup>3</sup>, David A Fitzmaurice<sup>1\*</sup> on behalf of UK  
11 GARFIELD-AF Investigators† and GARFIELD-AF Steering Committee  
12

13  
14  
15  
16 <sup>1</sup>Clinical Trials Unit, Warwick Medical School, University of Warwick, Coventry, Birmingham, UK

17  
18 <sup>2</sup>Thrombosis Research Institute, London, UK

19  
20 <sup>3</sup>Nuffield Department of Primary Care Health Sciences, University of Oxford, Oxford, UK  
21

22  
23  
24 †A full list of the UK GARFIELD-AF Investigators is given in the Appendix.  
25

26  
27  
28 \*Correspondence  
29

30 Patricia Apenteng  
31

32 Clinical Trials Unit, Warwick Medical School, University of Warwick, Coventry CV4 7AL, UK  
33

34 Email [p.apenteng@warwick.ac.uk](mailto:p.apenteng@warwick.ac.uk)  
35

36 Tel: +44 (0)24 76572815  
37  
38  
39  
40  
41

42 Word count (excluding abstract): 3171  
43  
44  
45  
46  
47  
48  
49  
50  
51  
52  
53  
54  
55  
56  
57  
58  
59  
60

**Abstract**

**Objective** To investigate evolving patterns in antithrombotic treatment in UK patients with newly diagnosed non-valvular atrial fibrillation (AF).

**Design** Prospective, multicentre, international registry

**Setting** 186 primary care practices in the UK

**Participants** 3482 participants prospectively enrolled in four sequential cohorts (cohort 2 {C2} n=830, diagnosed September 2011 to April 2013; cohort 3 {C3} n=902, diagnosed July 2014 to June 2015; cohort 4 {C4} n=850, diagnosed July 2014 to June 2015; cohort 5 {C5} n=900, diagnosed June 2015 to July 2016). Participants were newly diagnosed with non-valvular AF, aged  $\geq 18$  and provided informed consent.

**Main outcome measures** Antithrombotic treatment initiated at diagnosis, overall and according to stroke and bleeding risks. Stroke risk was retrospectively calculated using CHA<sub>2</sub>DS<sub>2</sub>-VASc and bleeding risk using HAS-BLED (modified).

**Results** 42.7% were female and the mean age was 74.5 years. The median CHA<sub>2</sub>DS<sub>2</sub>-VASc score was 3 in all cohorts and the median HAS-BLED score was 2 in all cohorts. There was a statistically significant increase in the use of anticoagulant therapy from C2 to C5 (C2 54.7%, C3 60.3%, C4 73.1%, C5 73.9%; p for trend <0.0001). The increase in the use of anticoagulant was mainly in patients with CHA<sub>2</sub>DS<sub>2</sub>-VASc  $\geq 2$ . The use of vitamin K antagonists (VKA)  $\pm$  antiplatelet drugs (AP) decreased from C2 to C5 (C2 53.3%, C3 52.1%, C4 50.3%, C5 30.6%), while the use of non-vitamin K antagonist oral anticoagulants (NOACs)  $\pm$  AP increased (C2 1.3%, C3 8.0%, C4 22.7%, C5 43.3%). The use of AP only decreased (C2 36.4%, C3 25.5%, C4 11.9%, C5 10.5%), as did the combination therapy of VKA + AP (C2 13.5%, C3 10.8%, C4 9.5%, C5 5.8%).

**Conclusion** There has been a progressive increase in the proportion of patients newly diagnosed with AF receiving guideline-recommended therapy in the UK, potentially driven by the availability of NOACs.

**Trial registration** ClinicalTrials.gov: NCT01090362

**Article summary***Strengths and limitations of the study*

- This study describes real world clinical practice in the UK for treatment initiated at AF diagnosis in patients with AF and at least one risk factor for stroke
- Eligible patients were enrolled prospectively and consecutively without exclusions according to comorbidities or treatment
- Patients were recruited in primary care in the UK, encompassing patients diagnosed in a comprehensive range of national care settings
- Does not include patients without capacity to consent

For peer review only

## Introduction

Atrial fibrillation (AF) is a potent risk factor for stroke and mortality; people with AF have a fivefold increased risk of stroke and a twofold increased risk of death.<sup>1,2</sup> AF-related strokes are more serious and are more likely to be fatal or lead to long-term disability than strokes in people without this arrhythmia.<sup>3</sup> Stroke prevention is therefore a principal goal in the treatment of AF,<sup>4</sup> and a major public health priority<sup>5</sup>. Fortunately, there are effective therapies, with anticoagulation shown to mitigate up to two-thirds of this stroke risk.

Since 2010, changes in treatment guidelines have widened the criteria for patients with AF that should be considered for antithrombotic therapy and now advocate anticoagulants (ACs) as the only appropriate antithrombotic therapy in patients with AF.<sup>4,5</sup> ACs include vitamin K antagonists (VKAs; typically warfarin) and recently, non-VKA oral anticoagulants (NOACs), comprising factor Xa inhibitors and direct thrombin inhibitors. Whereas the only anticoagulant previously recommended was warfarin, the updated AF guidelines include recommendations for NOACs for patients with non-valvular AF.

In 2014, NICE updated its guidelines on the management of AF, recommending the CHA<sub>2</sub>DS<sub>2</sub>-VASc stroke risk tool for assessing stroke risk in patients with AF, and further recommending anticoagulation therapy for patients at high risk (CHA<sub>2</sub>DS<sub>2</sub>-VASc  $\geq$  2), a consideration of anticoagulant therapy for patients at moderate risk (CHA<sub>2</sub>DS<sub>2</sub>-VASc = 1), and no anticoagulant or antiplatelet treatment for patients at low risk (defined as CHA<sub>2</sub>DS<sub>2</sub>-VASc = 0 for men and CHA<sub>2</sub>DS<sub>2</sub>-VASc = 1 for women).<sup>5</sup> In addition, the emergence of NOACs in the UK since 2012 has provided a wider range of anticoagulant options, particularly for patients for whom warfarin may not be appropriate. The change in guidelines coupled with the emergence of NOACs has the potential to transform clinical practice; however, the impact on utilisation of anticoagulants in patients with AF in the UK is unclear.

More than 46,000 new cases of AF are diagnosed in the UK every year. Many studies have reported a longstanding problem of under-treatment with anticoagulants of patients at high risk of stroke<sup>6,7</sup>; UK studies in the last decade also report suboptimal treatment<sup>8-11</sup>, though there is limited evidence of AF management since the introduction of NOACs. Little is known about the contemporary real-world management of patients newly diagnosed with AF and perceived to be at risk of stroke by their physicians. The Global Anticoagulant Registry in the FIELD–Atrial Fibrillation (GARFIELD-AF) aims to determine real-life treatment patterns and clinical outcomes of patients newly diagnosed with non-valvular AF with at least one investigator-determined risk factor for stroke.<sup>12,13</sup> This paper investigates the evolving patterns of antithrombotic treatment of UK patients enrolled in the GARFIELD-AF registry from September 2011 to July 2016.

## Methods

### *Study design*

GARFIELD-AF is an ongoing, prospective, non-interventional, international registry of adults ( $\geq$  18 years) diagnosed with AF. Patients were recruited into five independent cohorts: the first cohort also included a validation cohort of retrospective patients.

### *Participants*

Inclusion criteria for the prospective cohort comprised a new diagnosis of non-valvular AF of up to 6 weeks with an investigator-determined risk factor for stroke. Eligible patients were recruited consecutively at participating sites in order to prevent selection bias. The retrospective cohort comprised patients diagnosed 6–24 months before enrolment. Patients are followed up for a minimum of 2 years. Patients with transient AF secondary to a reversible cause and patients for whom follow-up was not possible were excluded from the registry. Full methods of the GARFIELD-AF registry have been previously reported.<sup>12 13</sup>

This paper reports baseline characteristics and treatment patterns in UK participants enrolled into cohorts 2 to 5; participants enrolled into cohort 1 were excluded as it consisted predominantly of a retrospective validation cohort.

### *Setting*

UK enrolment into cohorts 2 to 5 was undertaken in September 2011 to July 2016 at 186 general practices (GPs) across the UK (161 in England, 8 in Wales, 8 in Northern Ireland and 9 in Scotland). The necessary regulatory approvals were obtained prior to recruitment and all patients provided written informed consent prior to enrolment into the registry. The standard national diagnostic criteria for AF apply for GARFIELD-AF, and for the UK this was by electrocardiogram confirmation.

### *Data sources*

Data collected at baseline comprised: demographics; body mass index; type of AF; care setting of diagnosis; treatment strategy initiated at diagnosis; reason for treatment decision; and medical history. Data were collected through review of medical records by trained site staff using an electronic case report form (eCRF).

The stroke risk score CHA<sub>2</sub>DS<sub>2</sub>-VAsc was calculated retrospectively using the variables heart failure, hypertension, age ≥ 75 years and 65–74 years, diabetes mellitus, prior stroke or transient ischaemic attack (TIA), left ventricular ejection fraction < 40%, prior thromboembolism, vascular disease, and female gender. 'Modified' HAS-BLED scores were calculated retrospectively using the variables hypertension, abnormal renal/liver function, stroke, bleeding history or predisposition, elderly (> 65), and drugs/alcohol concomitantly.

Data for the analysis in this report was extracted from the study database on 28 July 2016.

### *Definitions*

ACs include VKAs and NOACs. NOACs include oral direct factor Xa inhibitors (FXAs) and oral direct thrombin inhibitors (DTIs).

Vascular disease was defined as peripheral artery disease and/or coronary artery disease (CAD) with a history of acute coronary syndromes. Hypertension was defined as a documented history of hypertension or blood pressure > 140/90 mm Hg. Chronic kidney disease (CKD) was classified according to the National Kidney Foundation's Kidney Disease Outcomes Quality Initiative (NKF

1  
2  
3 KDOQI) guidelines<sup>14</sup>: moderate to severe includes stages III to V; none or mild includes all other  
4 patients.

### 5 6 *Statistical analysis*

7  
8 Patient characteristics and medical history are described by cohort. Continuous variables are  
9 expressed as number of patients and mean  $\pm$  standard deviation (SD) and or median and  
10 interquartile range. Categorical variables are expressed as frequencies and percentages. Treatment  
11 patterns were analysed by cohort, and by cohort and CHA<sub>2</sub>DS<sub>2</sub>-VASc or HAS-BLED. Trends were  
12 assessed using an extension of the Wilcoxon rank-sum test.

13  
14  
15 Logistic regression models were used to assess the risk factors associated with the prescribing of  
16 NOACs (versus VKA). The following risk factors were included in the model: gender, age group, race,  
17 smoking, congestive heart failure (CHF), hypertension, diabetes, CAD, vascular disease, dementia,  
18 moderate-to-severe CKD, non-steroidal anti-inflammatory drug (NSAID) usage, history of bleeding,  
19 previous stroke/TIA/systemic embolism (SE), and cohort. Odds ratios (ORs) with 95% confidence  
20 intervals (CIs) were estimated to describe the associations of the risk factors and prescribing of  
21 NOACs versus VKA.  
22

23  
24  
25 Multiple Imputation by Chained Equations (MICE) was used to fill in missing values, creating five  
26 complete datasets.<sup>17 18</sup> Logistic regression was performed using the imputed datasets. First-degree  
27 interaction between comorbidities and time (cohort) was tested using likelihood ratio tests. Only  
28 significant interactions were included in the final model.  
29

30  
31 Statistical analysis was performed using both SAS software version 9.4 (SAS Institute Inc, Cary, NC,  
32 USA) and Stata Statistical Software: Release 14 (StataCorp, College Station, TX, USA).  
33

## 34 35 36 **Results**

### 37 38 *Patient distribution and characteristics*

39  
40 In the UK, 3482 patients were enrolled into cohorts 2 to 5 between September 2011 and July 2016:  
41 cohort 2 (C2) consisted of 830 patients diagnosed with AF between September 2011 and April 2013,  
42 cohort 3 (C3) consisted of 902 patients diagnosed between April 2013 and June 2014, cohort 4 (C4)  
43 consisted of 850 patients diagnosed between July 2014 and June 2015, and cohort 5 (C5) consisted  
44 of 900 patients diagnosed between June 2015 and July 2016. Overall, 42.7% of patients were female,  
45 mean age (SD) at diagnosis was 74.5 years (9.5) and 89.7% had a CHA<sub>2</sub>DS<sub>2</sub>-VASc score of  $\geq 2$  (Table  
46 1).  
47  
48

49  
50 Participants were diagnosed in a broad range of care settings representative of those in the UK:  
51 more than half of the patients (2124/3482; 61.0%) were diagnosed in primary care. The remainder  
52 were diagnosed in internal (general) medicine (21.9%), cardiology (15.2%), geriatrics (1.8%), and  
53 neurology (0.1%). Of the 3482 participants, 1370 (39.3%) had new or unclassified AF, 640/3482  
54 (18.4%) had paroxysmal AF, 272/3482 (7.8%) had persistent AF and 1200/3482 (34.5%) had  
55 permanent AF. There were some variations in baseline characteristics across the four cohorts (Table  
56 1), though the median CHA<sub>2</sub>DS<sub>2</sub>-VASc and HAS-BLED scores were similar.  
57  
58  
59  
60



### *Antithrombotic therapy use by cohort*

Figure 1 shows the treatment patterns at diagnosis in each of the four cohorts. The proportion of patients prescribed AC therapy at diagnosis, with or without an antiplatelet (AP), increased consistently from C2 to C5 (54.7%, 60.3%, 73.1% and 73.9%;  $p$  for trend  $< 0.0001$ ), whereas the use of AP only decreased (36.4%, 25.5%, 11.9% and 10.5%). At the same time, there was an increase in the proportion of patients receiving NOACs with or without AP from C2 to C5 (1.3%, 8.1%, 22.7%, 43.3%); the proportion of patients not receiving any antithrombotic therapy increased from C2 to C4 (8.9%, 14.4%, 15.1%) then stayed similar in C5 (15.7%). Co-prescription of AC and AP was variable (C2 14.0%, C3 11.8%, C4 11.4%, C5 11.7%). Table 2 shows selected baseline characteristics for all patients (C2 to C5 combined) according to treatment group. Patients receiving no treatment generally had a lower incidence of comorbidities, apart from history of bleeding; however, patients aged  $\geq 75$  years were more likely not to receive treatment.

Overall, 19.1% (666/3482) of patients were prescribed NOACs. Table 3 shows the baseline characteristics of patients on NOACs by cohort. There were no clear patterns of NOACs use by patient characteristics; however, patients diagnosed in cardiology in the earlier cohorts were more likely to be given NOACs than those in the later cohorts, whilst among patients diagnosed in primary care the later cohorts were more likely to receive NOACs than earlier cohorts. Of the patients prescribed either NOACs or VKA, those aged  $\geq 85$  years, with hypertension, CAD, vascular disease, dementia, previous stroke/TIA/SE, or bleeding and ex or current smokers were more likely to receive NOACs than VKA (Table 4). Also, patients were more likely to receive NOACs over VKA as the cohorts progressed, from C2 to C5; however, no interaction between cohort and covariates was statistically significant.

### *Antithrombotic therapy use according to risk score*

Figure 2 shows the use of antithrombotic therapy according to CHA<sub>2</sub>DS<sub>2</sub>-VASc score and cohort. The use of AC increased from C2 to C4 for patients at all levels of stroke risk (low, moderate and high risk), though the increase was highest in patients with a CHA<sub>2</sub>DS<sub>2</sub>VASc of  $\geq 2$  (C2 56.3%; C4 75.6%). (The registry includes patients classed as low risk according to the CHA<sub>2</sub>DS<sub>2</sub>VASc score {i.e. 0 for men, 1 for women} because the determination of risk factors was left to the clinician's judgement and not pre-specified in the protocol.) At the same time, there was a decline in the proportion of patients receiving AP only and an increase in the proportion of high-risk patients not receiving any antithrombotic therapy. The overall use of antithrombotic therapy decreased in patients with low risk of stroke from C2 to C4, driven by a decline in the use of AP only from 41.7% in C2 to 11.8% in C4. Also, the proportion of low-risk patients not receiving any antithrombotic therapy increased from 25% to 35.5%. There was a slightly different pattern from C4 to C5; there was a slight decrease in the use of AC in patients at low risk (C4 53.0%, C5 0.0%) and C5 had the largest proportion of low-risk patients not receiving treatment (50.0%). C5 saw an increase in NOACs use across all stroke risk levels, along with a decrease in the use of VKA.

Figure 3 shows the use of antithrombotic therapy according to HAS-BLED score and cohort. There was an increase in AC use over the study period for patients with a HAS-BLED score of 0 to 2; notably, there was a steady increase in AC use in patients with HAS-BLED  $\geq 3$ , peaking at C4 (C2 24.1%, C3 33.7%, C4 66%, C5 62.4%) at the expense of AP use.

### *Main reason anticoagulant was not used in patients with CHA<sub>2</sub>DS<sub>2</sub>-VASc ≥ 2*

The main reasons why ACs were not used in patients with a CHA<sub>2</sub>DS<sub>2</sub>-VASc score of ≥2 are shown in Table 5. The top two known reasons were patient refusal and physician's choice. Patient refusal was variable, and in the most recent cohort (C5) it accounted for 11.2% of high-risk patients not receiving AC. There were also some variations in the reasons for physicians choosing not to give high-risk patients ACs across the cohorts; the main reason in C2 was fall risk, whereas the main reason in C5 was bleeding risk.

## **Discussion**

These findings from the UK cohort of the GARFIELD-AF registry indicate a progressive improvement in the clinical management of AF, with newly diagnosed at-risk patients with AF more often receiving guideline-recommended therapy. The proportion of patients on AC increased (C2 54.5%, C3 60.1%, C4 72.9%, C5 73.9%) and the increase in the use of AC was mainly in patients with CHA<sub>2</sub>DS<sub>2</sub>-VASc ≥ 2. There was a notable increase in the use of NOACs ± AP (C2 1.3%, C3 8.0%, C4 23.0%, 43.3%), and C5 saw a change in VKA prescribing, with NOACs being prescribed in place of VKA. The use of AP only decreased (C2 36.5%, C3 25.3%, C4 11.9%, C5 10.5%); however, the co-prescription of AC + AP did not change much (C2 14%, C3 11.8%, C4 11.4%, C5 11.7%). AC use decreased with bleeding risk, with people with HAS-BLED ≥ 3 less likely to be anticoagulated; nevertheless, use of AC in patients with HAS-BLED ≥ 3 increased notably from 24% in C2 to the peak of 66% in C4.

In addition, there was a decline in AP use in patients at low risk, with a corresponding increase in the proportion of patients in this category not receiving any antithrombotic therapy. However, an important proportion of low-risk patients received AC over the period, with 50% of low-risk patients receiving AC in the most recent cohort.

Our findings are, to a large extent, consistent with changes in AF management guidelines. In the UK, NICE guidelines up until 2014 recommend that high-risk patients should be on warfarin, those at moderate risk should receive warfarin or aspirin, and low-risk patients should not be on warfarin (but could be prescribed aspirin).<sup>17</sup> The current (2014) guidelines no longer recommend aspirin; patients should receive anticoagulation or not.<sup>5</sup> The notable increase in AC use and corresponding decline in AP use fall within the guidelines; our data suggests patients that would have been given aspirin in earlier cohorts are now given AC, also that the increase in AC use is potentially driven by the availability of NOACs.

This is the first UK study to describe the reasons for not anticoagulating real-world patients in relation to stroke risk, and the findings corroborate our deduction that guidelines have influenced clinical practice. The data suggests that patient refusal (11.2% for high-risk patients in the most recent cohort) may be the main patient factor affecting rates of anticoagulation. There is little UK evidence on AC treatment rates in the post-VKA only era; nevertheless, co-prescription of ACs and APs (15.1%) is higher than reported by Kassianos et al<sup>11</sup> (11% initiated on ACs plus APs within 12 weeks of diagnosis of AF).

### *Strengths and limitations*

1  
2  
3 This study describes real-world clinical practice in the UK for treatment initiated at AF diagnosis in  
4 patients with AF and at least one risk factor for stroke. Recruiting patients from primary care  
5 captures patients regardless of the care setting of diagnosis, therefore providing a pool of patients  
6 representative of UK patients diagnosed with AF. Study sites sought to recruit consecutive eligible  
7 patients, thereby reducing the risk of selection bias. In addition, the 6-week period between  
8 diagnosis and enrolment minimises the risk of excluding deceased patients.  
9

10  
11 The study is subject to the limitations inherent to observational studies, although efforts were made  
12 to standardise definitions and reduce missing data. Ethical approval for the study does not cover  
13 patients without the capacity to consent. The data on low-risk patients' needs to be interpreted with  
14 caution due to the low numbers in the UK sample. Comorbidities are likely confounders in treatment  
15 strategies; however, these were not comprehensively incorporated in this analysis.  
16

### 17 18 *Comparison with global GARFIELD-AF data*

19  
20 Evolving antithrombotic treatment patterns up to C4 for the global GARFIELD-AF population have  
21 previously been published<sup>18</sup>; our comparison is in relation to UK patients enrolled during the  
22 corresponding recruitment period (C2 to C4). Globally, a total of 34,170 patients were enrolled into  
23 C2 to C4 in 34 countries. UK patients were older than patients in the global study: mean age of 74.7  
24 years compared with 69.9 years in the global study.<sup>18</sup> UK patients had less heart failure (7.6% vs  
25 19.8%), higher prevalence of CKD (26.5% vs 10.3%), but similar rates of CAD and ACS. UK patients  
26 had a higher proportion of those with CHA<sub>2</sub>DS<sub>2</sub>-VASc score of 0–1 (10.5% vs 14.7%) and a lower  
27 proportion with HAS-BLED of 0–2 (81.3% vs 88.7%).  
28

29  
30 Despite starting from a lower baseline, the use of AC in the UK in the most recent cohort is  
31 comparable to that in the global study (UK 54.7% to 73.1%, global 62.1% to 71.1%).<sup>18</sup> Nevertheless,  
32 the uptake of NOACs is higher in global study, with NOACs being prescribed in place of VKA, whereas  
33 VKA prescribing in the UK hardly changed up until C4 (NOACs use in C4: global 37.2%, UK 22.7%). In  
34 C5 however, UK data illustrates a decline in VKA prescribing matched by an increase in NOACs use.  
35 As in the UK population, over-treatment of patients at low risk of stroke was observed in the global  
36 population, and over 50% of low-risk patients in C4 received AC. Co-prescription of AC + AP was also  
37 an issue in the global population, with 6.8% affected in C4; however, the UK seems to have  
38 responded better to the renunciation of AP only as a treatment option: in C4, 11.7% of high-risk UK  
39 patients were given AP only compared with 16.0% in the global population.  
40  
41

### 42 43 *Implications for practice*

44  
45 These data indicate progressive concordance with evidence-based guidelines and clinical practice in  
46 the UK for patients newly diagnosed with AF. More UK patients are receiving guideline-  
47 recommended therapy; this is significant, given the increasing prevalence of AF in the UK. Although  
48 the proportion of high-risk patients taking an AC in most recent cohort is unprecedented, about a  
49 quarter of high-risk patients still do not receive AC therapy, indicating that there is further scope for  
50 improvement. It is important to elucidate the reasons why some high-risk patients do not receive  
51 anticoagulation; in particular, the reasons and circumstances for patient refusal need to be explored  
52 (and documented). An important proportion of low-risk patients are still receiving AC despite the  
53 proven capability of the CHA<sub>2</sub>DS<sub>2</sub>-VASc score to identify patients at truly low risk. Further attention  
54 to patients in this category will be beneficial. Also, patients are being co-prescribed ACs and aspirin  
55  
56  
57  
58  
59  
60

1  
2  
3 (11.7% of high-risk patients in most recent cohort), a combination that is rarely indicated since it  
4 increases bleeding risk by over 50%; it might be worth exploring the rationale for this in future  
5 research.  
6

7  
8 The clinical management of patients with AF is evolving and treatment outcomes will become  
9 clearer with time. GARFIELD-AF provides real-world data on evolving treatment patterns and further  
10 data will provide insight into corresponding treatment outcomes.  
11

12  
13  
14  
15  
16  
17  
18  
19  
20  
21  
22  
23  
24  
25  
26  
27  
28  
29  
30  
31  
32  
33  
34  
35  
36  
37  
38  
39  
40  
41  
42  
43  
44  
45  
46  
47  
48  
49  
50  
51  
52  
53  
54  
55  
56  
57  
58  
59  
60

For peer review only

**Funding**

The GARFIELD-AF registry is sponsored by the Thrombosis Research Institute, London, UK. Funding of the registry is provided through an educational research grant from Bayer AG (Berlin, Germany).

**Ethical approval**

The UK has received ethical approval from the South East London Research Ethics Committee 5 (REC 5) on 29 September 2010; REC reference 10/H0805/48.

**Copyright for publication**

The Corresponding Author has the right to grant on behalf of all authors and does grant on behalf of all authors, a worldwide licence to the Publishers and its licensees in perpetuity, in all forms, formats and media (whether known now or created in the future), to i) publish, reproduce, distribute, display and store the Contribution, ii) translate the Contribution into other languages, create adaptations, reprints, include within collections and create summaries, extracts and/or, abstracts of the Contribution, iii) create any other derivative work(s) based on the Contribution, iv) to exploit all subsidiary rights in the Contribution, v) the inclusion of electronic links from the Contribution to third party material where-ever it may be located; and, vi) licence any third party to do any or all of the above.

**Competing interests**

Mrs Apenteng has nothing to disclose; Dr Gao has nothing to disclose; Professor Hobbs reports personal fees and other from BMS/Pfizer, personal fees and other from BI, personal fees and other from Bayer, outside the submitted work. Professor Fitzmaurice has nothing to disclose.

**Authors' contributions**

PNA contributed to the acquisition, analysis and interpretation of data for the study, and drafted the manuscript. HG contributed to the analysis and interpretation of the data and revised the work critically for intellectual content. FDRH contributed to the interpretation of the data and revised the work critically for intellectual content. DAF contributed to the acquisition, analysis and interpretation of the data and revised the work critically for intellectual content. DAF is also the Principal Investigator and guarantor for the UK study. All authors approved the final version of the manuscript, and are accountable for all aspects of the work.

**Transparency declaration**

The corresponding author affirms that this manuscript is an honest, accurate and transparent account of the study being reported; that no important aspects of the study have been omitted; and that any discrepancies from the study as planned have been explained.

**Data sharing statement**

No additional data available.

**Acknowledgements**

We thank the physicians, nurses and patients involved in the GARFIELD-AF registry. SAS programming support was provided by Madhusudana Rao (Thrombosis Research Institute, London, UK). Editorial support was provided by Emily Chu (Thrombosis Research Institute, London, UK).

## References

1. Wolf P. Atrial fibrillation as an independent risk factor for stroke: the Framingham Study. *Stroke* 1991;**8**(22):983-88.
2. Wolf P, Abbott R, Kannel W. Atrial fibrillation: a major contributor to stroke in the elderly. The Framingham Study. *Arch Intern Med* 1987;**147**(9):1561-64.
3. Jorgensen HS, Nakayama H, Reith J, Raaschou HO, Olsen TS. Acute Stroke With Atrial Fibrillation. The Copenhagen Stroke Study. *Stroke* 1996; 27(10):1765-1769.
4. Camm AJ, Kirchhof P, Lip GYH, et al. Guidelines for the management of atrial fibrillation. The Task Force for the Management of Atrial Fibrillation of the European Society of Cardiology (ESC) 2010;**31**(19):2369-429.
5. NICE. Nice Clinical Guideline 180; Atrial Fibrillation: the management of atrial fibrillation. <https://www.nice.org.uk/guidance/cg180> [ 2014 Available from: URL: <https://www.nice.org.uk/guidance/cg180>
6. Ogilvie IM, Newton N, Welner SA, Cowell W, Lip GYH. Underuse of oral anticoagulants in atrial fibrillation: a systematic review. *The American Journal of Medicine* 2010; 123(7):638-645.
7. Baczek VL, Chen WT, Kluger J, Coleman CI. Predictors of warfarin use in atrial fibrillation in the United States: a systematic review and meta-analysis. *BMC Fam Pract* 2012; 3(13). doi:10.1186/1471-2296-13-5
8. Mohammed MA, Marshall T, Nirantharakumar K, Stevens A, Fitzmaurice DA. Patterns of warfarin use in subgroups of patients with atrial fibrillation: a cross-sectional analysis of 430 general practices in the United Kingdom. *PLOS ONE* 2013; 8(5):e61979.
9. Holt TA, Hunter TD, Gunnarsson C. Risk of stroke and oral anticoagulant use in atrial fibrillation: a cross-sectional survey. *British Journal of General Practice* 2012; 2012(62):710-717.
10. Cowan C, Healicon R, Robson I, Long R, Barrett J, Fay M et al. The use of anticoagulants in the management of atrial fibrillation among general practices in England. *Heart* 2013; 2012(303472). doi:10.1136/heartjnl-2012-303472
11. Kassianos G, Arden C, Hogan S, Dew R, Fuat A. Current management of atrial fibrillation: an observational study in NHS primary care. *BMJ Open* 2013; 3(11):e003004.
12. Kakkar AK, Mueller I, Bassand JP, Fitzmaurice DA, Goldhaber SZ, Goto S et al. International longitudinal registry of patients with atrial fibrillation at risk of stroke: Global Anticoagulant Registry in the FIELD (GARFIELD). *Am Heart J* 2012; 163(1):13-19.
13. Apenteng P, Murray E, Holder R, Hobbs F, Fitzmaurice D. An international longitudinal registry of patients with atrial fibrillation at risk of stroke (GARFIELD): the UK protocol. *BMC Cardiovascular Disorders* 2013; 13(31). doi: 10.1186/1471-2261-13-31.
14. Foundation NK. K/DOQI clinical practice guidelines for chronic kidney disease: evaluation, classification, and stratification. *Am J Kidney Dis* 2002;**39** (Suppl 1):S1-266.

- 1  
2  
3 15. Van Buuren S. Multiple imputation of discrete and continuous data by fully conditional  
4 specification. *Stat Methods Med Res* 2007;16:219-42.  
5  
6 16. Raghunathan TE, Lepkowski JM, Van Hoewyk J, et al. A multivariate technique for multiply  
7 imputing missing values using a sequence of regression models. *Survey Methodology*  
8 2001;85:85-95.  
9  
10 17. National Institute for Health and Clinical Excellence (NICE). Clinical Guideline CG36 - Atrial  
11 Fibrillation: The management of atrial fibrillation [2006]. <http://www.nice.org.uk/CG36>  
12  
13 18. Camm AJ, Accetta G, Ambrosio G et al. Evolving antithrombotic treatment patterns for patients  
14 with newly diagnosed atrial fibrillation. *Heart* 2017;103:307-314  
15  
16  
17  
18  
19  
20  
21  
22  
23  
24  
25  
26  
27  
28  
29  
30  
31  
32  
33  
34  
35  
36  
37  
38  
39  
40  
41  
42  
43  
44  
45  
46  
47  
48  
49  
50  
51  
52  
53  
54  
55  
56  
57  
58  
59  
60



Figure 1. Antithrombotic treatment at diagnosis by cohort

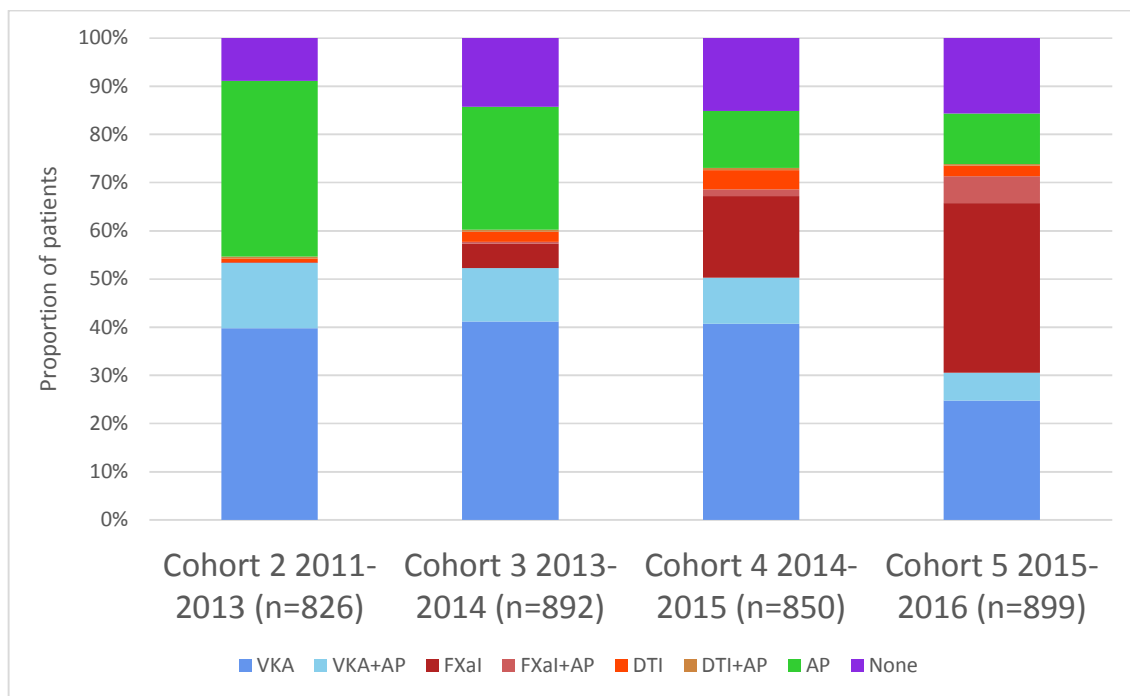

VKA, vitamin K antagonist; AP, antiplatelet; FXa, factor Xa inhibitor; DTI direct thrombin inhibitor.

Figure 2. Antithrombotic treatment at diagnosis by CHA<sub>2</sub>DS<sub>2</sub>-VASc and cohort, for patients with a score of 0, 1 and ≥ 2

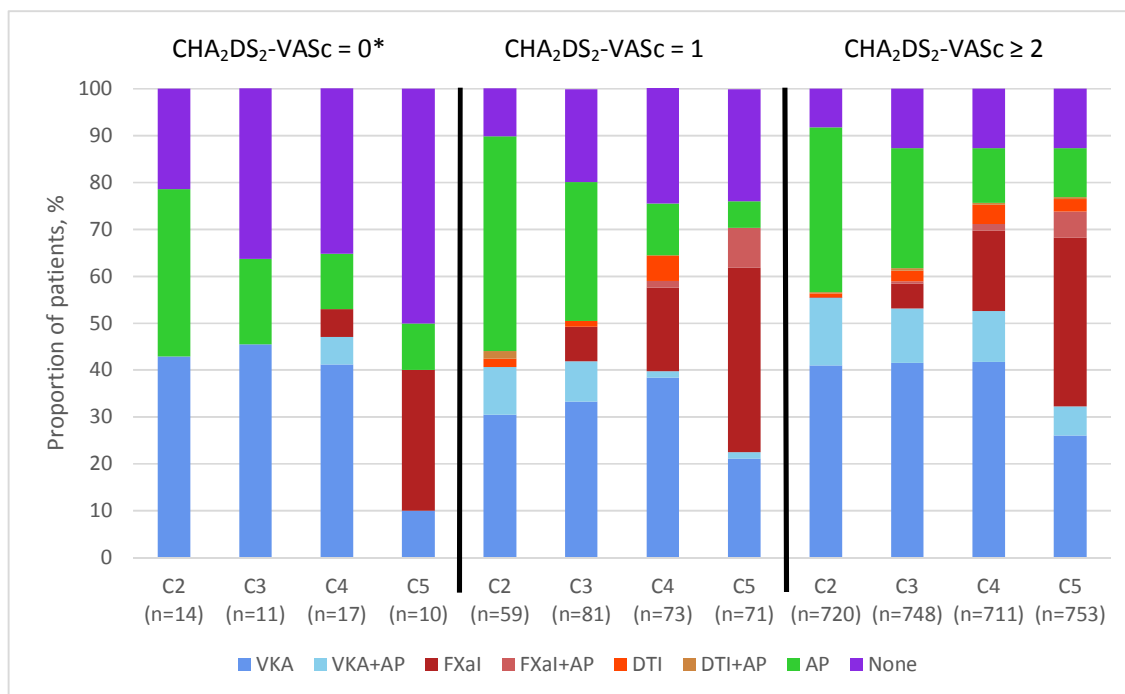

\* includes women with no other risk factors

The total population represented by n excludes unknowns. Patients with missing CHA<sub>2</sub>DS<sub>2</sub>-VASc score: C1, 35; C2, 58; C3, 210; C4, 49; C5, 65. AP, antiplatelet; CHA<sub>2</sub>DS<sub>2</sub>-VASc, cardiac failure, hypertension, age ≥75 (doubled), diabetes, stroke (doubled)-vascular disease, age 65–74 and sex category (female); DTI, direct thrombin inhibitor; FXaI, factor Xa inhibitor; VKA, vitamin K antagonist.

Figure 3. Antithrombotic treatment at diagnosis by HAS-BLED score and cohort, for patients with a score of 0–2 and ≥3

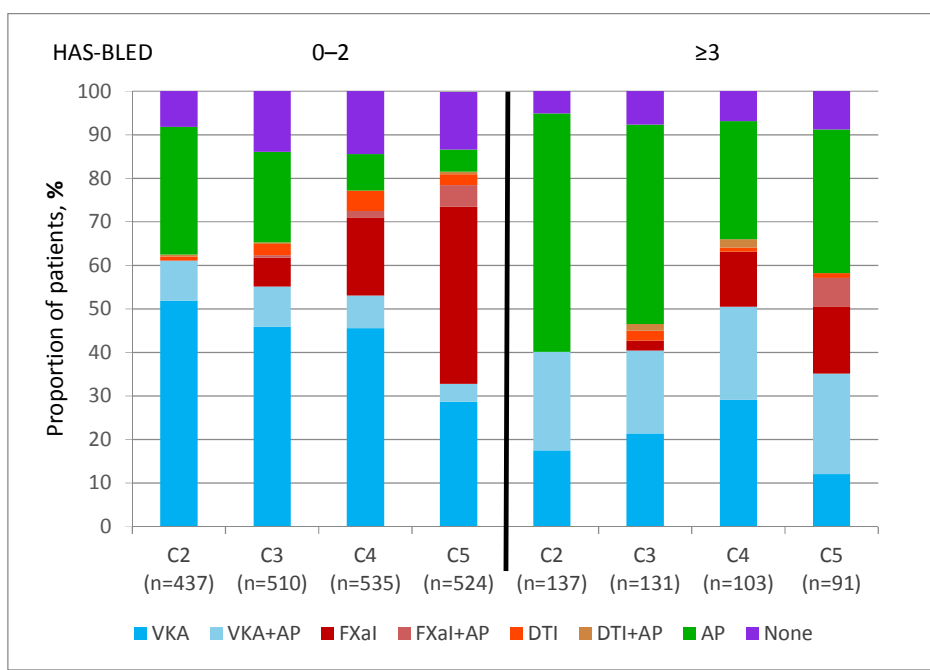

VKA, vitamin K antagonist; AP, antiplatelet; FXa, factor Xa inhibitor; DTI direct thrombin inhibitor.

view only

Table 1. Baseline characteristics of patients in cohorts 2 to 5

| Variable                                             | Cohort 2<br>(N=830)<br>(n %)  | Cohort 3<br>(N=902)<br>(n %)  | Cohort 4<br>(N=850)<br>(n %)  | Cohort 5<br>(N=900)<br>(n %)  | Total<br>C2 to C5<br>(N=3482)<br>(n %) |
|------------------------------------------------------|-------------------------------|-------------------------------|-------------------------------|-------------------------------|----------------------------------------|
| Female, n/N (%)                                      | 376/850 (45.3)                | 391/902 (43.3)                | 343/850 (40.4)                | 378/900 (42.0)                | 1488/3482 (42.7)                       |
| Age at diagnosis, years, mean (SD)                   | 75.2 (9.7)                    | 73.8 (9.7)                    | 74.2 (9.6)                    | 74.8 (9.0)                    | 74.5 (9.5)                             |
| Age group, n/N (%)                                   |                               |                               |                               |                               |                                        |
| < 65                                                 | 110/830 (13.3)                | 133/902 (14.7)                | 116/850 (13.6)                | 96/900 (10.7)                 | 455/3482 (13.1)                        |
| 65–74                                                | 222/830 (26.7)                | 315/902 (34.9)                | 293/850 (34.5)                | 322/900 (35.8)                | 1152/3482 (33.1)                       |
| ≥ 75                                                 | 498/830 (60.0)                | 454/902 (50.3)                | 441/850 (51.9)                | 482/900 (53.6)                | 1875/3482 (53.8)                       |
| Caucasian race, n/N (%)                              | 804/816 (98.5) <sup>a</sup>   | 867/884 (98.1) <sup>b</sup>   | 832/837 (99.4) <sup>c</sup>   | 853/860 (99.2) <sup>d</sup>   | 3356/3397 (98.8) <sup>e</sup>          |
| Medical history, n/N (%)                             |                               |                               |                               |                               |                                        |
| Congestive heart failure                             | 70/830 (8.4)                  | 69/902 (7.6)                  | 56/850 (6.6)                  | 57/900 (6.3)                  | 252/3482 (7.2)                         |
| Coronary artery disease                              | 166/830 (20.0)                | 165/902 (18.3)                | 164/850 (19.3)                | 174/900 (19.3)                | 669/3482 (19.2)                        |
| Acute coronary syndrome                              | 87/830 (10.5)                 | 74/896 (8.3) <sup>f</sup>     | 90/847 (10.6) <sup>g</sup>    | 89/897 (9.9) <sup>h</sup>     | 340/3470 (9.8) <sup>i</sup>            |
| Vascular disease                                     | 109/830 (13.1)                | 112 (12.5) <sup>j</sup>       | 125 (14.7) <sup>k</sup>       | 125 (13.9) <sup>l</sup>       | 471 (13.6) <sup>m</sup>                |
| Systemic embolism                                    | 9 (1.1)                       | 4 (0.4)                       | 3 (0.4)                       | 6 (0.7)                       | 22 (0.6)                               |
| Stroke/TIA                                           | 101 (12.2)                    | 105 (11.6)                    | 116 (13.6)                    | 106 (11.8)                    | 428 (12.3)                             |
| History of bleeding                                  | 28 (3.4)                      | 26 (2.9)                      | 23 (2.7)                      | 27 (3.0)                      | 104 (3.0)                              |
| Hypertension                                         | 10 (90.9)                     | 48 (65.8)                     | 139 (72.8)                    | 276 (71.1)                    | 473 (71.3)                             |
| Diabetes mellitus                                    | 136 (16.4)                    | 156 (17.3)                    | 168 (19.8)                    | 154 (17.1)                    | 614 (17.6)                             |
| Moderate-to-severe CKD*                              | 244 (29.4)                    | 241 (26.7)                    | 199 (23.4)                    | 196 (21.8)                    | 880 (25.3)                             |
| Risk scores                                          |                               |                               |                               |                               |                                        |
| CHA <sub>2</sub> DS <sub>2</sub> -VAsC, median (IQR) | 3.0 (2.0 to 4.0) <sup>n</sup> | 3.0 (2.0 to 4.0) <sup>o</sup> | 3.0 (2.0 to 4.0) <sup>p</sup> | 3.0 (2.0 to 4.0) <sup>q</sup> | 3.0 (2.0 to 4.0) <sup>r</sup>          |
| CHA <sub>2</sub> DS <sub>2</sub> -VAsC, 0–1, n/N (%) | 73/795 (9.2)                  | 93/844 (11.0)                 | 90/801 (11.2)                 | 81/835 (9.7)                  | 337/3275 (10.3)                        |
| HAS-BLED, median (IQR)†                              | 2.0 (1.0–2.0) <sup>s</sup>    | 2.0 (1.0–2.0) <sup>t</sup>    | 2.0 (1.0–2.0) <sup>u</sup>    | 2.0 (1.0–2.0) <sup>v</sup>    | 2.0 (1.0–2.0) <sup>w</sup>             |
| HAS-BLED, 0–2, n/N (%)‡                              | 437/574 (76.1)                | 510/641 (79.6)                | 535/638 (83.9)                | 524/615 (85.2)                | 2006/2468 (81.3)                       |

<sup>a</sup>14 patients missing, <sup>b</sup>18 patients missing, <sup>c</sup>13 patients missing, <sup>d</sup>40 patients missing, <sup>e</sup>85 patients missing, <sup>f</sup>6 patients missing, <sup>g</sup>3 patients missing, <sup>h</sup>3 patients missing, <sup>i</sup>12 patients missing, <sup>j</sup>7 patients missing, <sup>k</sup>2 patients missing, <sup>l</sup>1 patient missing, <sup>m</sup>11 patients missing, <sup>n</sup>35 patients missing, <sup>o</sup>58 patients missing, <sup>p</sup>49 patients missing, <sup>q</sup>65 patients missing, <sup>r</sup>207 patients missing, <sup>s</sup>256 patients missing, <sup>t</sup>261 patients missing, <sup>u</sup>212 patients missing, <sup>v</sup>285 patients missing, <sup>w</sup>2468 patients missing.

\*Includes NKF KDOQI stages III–V; TIA, transient ischaemic attack; CKD, chronic kidney disease; CHA<sub>2</sub>DS<sub>2</sub>-VAsC, cardiac failure, hypertension, age ≥ 75 (doubled), diabetes, stroke (doubled), vascular disease, age 65–74 and sex category (female); NKF KDOQI, National Kidney Foundation's Kidney Disease Outcomes Quality Initiative; †, modified HAS-BLED hypertension, abnormal renal/liver function, stroke, bleeding history or predisposition, elderly (> 65), and drugs/alcohol concomitantly

Table 2. Baseline characteristics of patients in cohort 2 to 5 by antithrombotic treatment type

|                                                      | None             | AP alone         | VKA alone        | NOAC alone       | AC + AP          | AC ± AP          |
|------------------------------------------------------|------------------|------------------|------------------|------------------|------------------|------------------|
| Number (total)                                       | 470              | 725              | 1267             | 587              | 425              | 2279             |
| Female, n (%)                                        | 201 (42.8)       | 291 (40.1)       | 565 (44.6)       | 262 (44.6)       | 167 (39.3)       | 994 (43.6)       |
| Age, mean (SD)                                       | 73.3 (10.5)      | 75.3 (9.7)       | 74.2 (9.4)       | 75.0 (9.4)       | 74.7 (8.2)       | 74.5 (9.2)       |
| Age 65–74, n (%)                                     | 153 (32.6)       | 217 (29.9)       | 430 (33.9)       | 198 (33.7)       | 150 (35.3)       | 778 (34.1)       |
| Age ≥ 75, n (%)                                      | 227 (48.3)       | 417 (57.5)       | 676 (53.4)       | 319 (54.3)       | 234 (55.1)       | 1229 (53.9)      |
| Medical history, n (%)                               |                  |                  |                  |                  |                  |                  |
| Heart failure (any)                                  | 22 (4.7)         | 46 (6.3)         | 97 (7.7)         | 36 (6.1)         | 49 (11.5)        | 182 (8.0)        |
| Hypertension (any)                                   | 325 (78.1)       | 531 (77.7)       | 961 (79.2)       | 451 (80.0)       | 331 (80.3)       | 1743 (79.6)      |
| Diabetes mellitus                                    | 51 (10.9)        | 105 (14.5)       | 249 (19.7)       | 94 (16.0)        | 112 (26.4)       | 455 (20.0)       |
| Stroke                                               | 12 (2.6)         | 55 (7.6)         | 78 (6.2)         | 46 (7.8)         | 52 (12.2)        | 176 (7.7)        |
| Systemic embolism                                    | -                | 5 (0.7)          | 12 (1.0)         | 1 (0.2)          | 4 (1.0)          | 17 (0.8)         |
| CAD (any)                                            | 37 (7.9)         | 187 (25.8)       | 168 (13.3)       | 90 (15.3)        | 182 (42.8)       | 440 (19.3)       |
| Vascular disease                                     | 23 (4.9)         | 120 (16.6)       | 125 (9.9)        | 64 (10.9)        | 137 (32.5)       | 326 (14.4)       |
| History of bleeding                                  | 34 (7.3)         | 35 (4.9)         | 14 (1.1)         | 15 (2.6)         | 6 (1.4)          | 35 (1.5)         |
| Moderate-to-severe CKD* (stages 3–5)                 | 94 (20.0)        | 208 (28.7)       | 331 (26.1)       | 128 (21.8)       | 117 (27.5)       | 576 (25.3)       |
| Risk scores                                          |                  |                  |                  |                  |                  |                  |
| CHA <sub>2</sub> DS <sub>2</sub> -VASc, mean (SD)    | 2.8 (1.4)        | 3.3 (1.5)        | 3.3 (1.4)        | 3.3 (1.4)        | 3.8 (1.5)        | 3.4 (1.4)        |
| CHA <sub>2</sub> DS <sub>2</sub> -VASc, median (IQR) | 3.0 (2.0 to 4.0) | 4.0 (3.0 to 5.0) | 3.0 (2.0 to 4.0) |
| CHA <sub>2</sub> DS <sub>2</sub> -VASc, 0–1, n (%)   | 75 (18.1)        | 73 (10.8)        | 107 (8.9)        | 57 (10.1)        | 24 (5.9)         | 188 (8.6)        |
| HAS-BLED, mean (SD) †                                | 1.4 (0.9)        | 2.4 (0.8)        | 1.4 (0.8)        | 1.4 (0.8)        | 2.4 (0.8)        | 1.6 (0.9)        |
| HAS-BLED, median (IQR) †                             | 1.0 (1.0 to 2.0) | 2.0 (2.0 to 3.0) | 1.0 (1.0 to 2.0) | 1.0 (1.0 to 2.0) | 2.0 (2.0 to 3.0) | 2.0 (1.0 to 2.0) |
| HAS-BLED, 0–2, n (%) †                               | 249 (88.7)       | 306 (61.3)       | 855 (90.2)       | 398 (91.9)       | 193 (63.9)       | 1446 (85.8)      |

AC, anticoagulant; AP, antiplatelet; CAD, coronary artery disease; CHA<sub>2</sub>DS<sub>2</sub>-VASc, cardiac failure, hypertension, age ≥75 (doubled), diabetes, stroke (doubled)-vascular disease, age 65–74 and sex category (female); CKD, chronic kidney disease; NKF KDOQI, National Kidney Foundation's Kidney Disease Outcomes Quality Initiative; NOAC, non-vitamin K antagonist oral anticoagulant; VKA, vitamin K antagonist.

\*Includes NKF KDOQI stages III–V.

†'modified' HAS-BLED, hypertension, abnormal renal/liver function (1 point each), stroke, bleeding history or predisposition, elderly (> 65), drugs/alcohol concomitantly (1 point each).

Table 3. Baseline characteristics of patients on NOACs by cohort

| Variable                                             | Cohort 2<br>(N=11) | Cohort 3<br>(N=73) | Cohort 4<br>(N=193) | Cohort 5<br>(N=389) | Total<br>C2 to C5<br>(N=666) |
|------------------------------------------------------|--------------------|--------------------|---------------------|---------------------|------------------------------|
| Female, n (%)                                        | 4 (36.4)           | 42 (57.5)          | 80 (41.5)           | 165 (42.4)          | 291 (43.7)                   |
| Age at diagnosis, years, mean (SD)                   | 75.9 (10.3)        | 74.8 (9.2)         | 74.7 (10.1)         | 74.7 (9.0)          | 74.7 (9.4)                   |
| Age group, n (%)                                     | 11 (0)             | 73 (0)             | 193 (0)             | 389 (0)             | 666 (0)                      |
| Age < 65                                             | 2 (18.2)           | 8 (11.0)           | 30 (15.5)           | 43 (11.1)           | 83 (12.5)                    |
| Age 65–74                                            | 3 (27.3)           | 29 (39.7)          | 59 (30.6)           | 138 (35.5)          | 229 (34.4)                   |
| Age ≥ 75                                             | 6 (54.5)           | 36 (49.3)          | 104 (53.9)          | 208 (53.5)          | 354 (53.2)                   |
| Care setting at diagnosis                            |                    |                    |                     |                     |                              |
| Internal medicine                                    | 2 (18.2)           | 18 (24.7)          | 53 (27.5)           | 108 (27.8)          | 181 (27.2)                   |
| Cardiology                                           | 4 (36.4)           | 11 (15.1)          | 21 (10.9)           | 59 (15.2)           | 95 (14.3)                    |
| Neurology                                            | -                  | -                  | 1 (0.5)             | 1 (0.3)             | 2 (0.3)                      |
| Geriatrics                                           | -                  | 2 (2.7)            | 2 (1.0)             | 7 (1.8)             | 11 (1.7)                     |
| Primary care/general practice                        | 5 (45.5)           | 42 (57.5)          | 116 (60.1)          | 214 (55.0)          | 377 (56.6)                   |
| Medical history                                      |                    |                    |                     |                     |                              |
| Congestive heart failure                             | 2 (18.2)           | 4 (5.5)            | 14 (7.3)            | 23 (5.9)            | 43 (6.5)                     |
| History of hypertension                              | 10 (90.9)          | 48 (65.8)          | 139 (72.8)          | 276 (71.1)          | 473 (71.3)                   |
| Diabetes mellitus                                    | 2 (18.2)           | 9 (12.3)           | 35 (18.1)           | 69 (17.7)           | 115 (17.3)                   |
| Stroke                                               | -                  | 7 (9.6)            | 16 (8.3)            | 32 (8.2)            | 55 (8.3)                     |
| Systemic embolism                                    | -                  | -                  | 1 (0.5)             | 2 (0.5)             | 3 (0.5)                      |
| Coronary artery disease                              | 1 (9.1)            | 11 (15.1)          | 43 (22.3)           | 73 (18.8)           | 128 (19.2)                   |
| Vascular disease                                     | 1 (9.1)            | 7 (9.7)            | 37 (19.3)           | 50 (12.9)           | 95 (14.3)                    |
| History of bleeding                                  | -                  | 3 (4.1)            | 2 (1.0)             | 11 (2.8)            | 16 (2.4)                     |
| Moderate-to-severe CKD                               | -                  | 26 (35.6)          | 47 (24.4)           | 70 (18.0)           | 143 (21.5)                   |
| Risk scores                                          |                    |                    |                     |                     |                              |
| CHA <sub>2</sub> DS <sub>2</sub> -VASc, mean (SD)    | 3.3 (1.7)          | 3.3 (1.4)          | 3.4 (1.5)           | 3.3 (1.4)           | 3.3 (1.5)                    |
| CHA <sub>2</sub> DS <sub>2</sub> -VASc, median (IQR) | 4.0 (2.0 to 4.0)   | 3.0 (2.0 to 4.0)   | 3.0 (2.0 to 4.0)    | 3.0 (2.0 to 4.0)    | 3.0 (2.0 to 4.0)             |
| CHA <sub>2</sub> DS <sub>2</sub> -VASc, 0–1, n (%)   | 2 (18.2)           | 7 (9.9)            | 19 (10.4)           | 37 (9.9)            | 65 (10.2)                    |
| HAS-BLED*, mean (SD)                                 | 1.2 (0.8)          | 1.7 (0.8)          | 1.5 (0.8)           | 1.4 (0.8)           | 1.5 (0.8)                    |
| HAS-BLED, median (IQR)                               | 1.0 (1.0 to 2.0)   | 2.0 (1.0 to 2.0)   | 1.0 (1.0 to 2.0)    | 1.0 (1.0 to 2.0)    | 1.0 (1.0 to 2.0)             |
| HAS-BLED, 0–2, n (%)                                 | 6 (100)            | 52 (86.7)          | 129 (89.0)          | 255 (92.4)          | 442 (90.8)                   |

CHA<sub>2</sub>DS<sub>2</sub>-VASc, cardiac failure, hypertension, age ≥ 75 (doubled), diabetes, stroke (doubled)-vascular disease, age 65–74 and sex category (female); \*‘modified’ HAS-BLED: hypertension, abnormal renal/liver function (1 point each), stroke, bleeding history or predisposition, elderly (> 65), drugs/alcohol concomitantly (1 point each); CKD, chronic kidney disease.

Table 4. The use of NOACs in relation to baseline characteristics for patients on an AC at baseline

| Variable                                                                                                                                                                                                                                                                                                                                                                                                                                                                                                                                                                                                                                                              | Cohorts 2 to 5<br>OR (95% CI) |
|-----------------------------------------------------------------------------------------------------------------------------------------------------------------------------------------------------------------------------------------------------------------------------------------------------------------------------------------------------------------------------------------------------------------------------------------------------------------------------------------------------------------------------------------------------------------------------------------------------------------------------------------------------------------------|-------------------------------|
| Gender                                                                                                                                                                                                                                                                                                                                                                                                                                                                                                                                                                                                                                                                |                               |
| Female                                                                                                                                                                                                                                                                                                                                                                                                                                                                                                                                                                                                                                                                | 1                             |
| Male                                                                                                                                                                                                                                                                                                                                                                                                                                                                                                                                                                                                                                                                  | 0.90 (0.72 to 1.12)           |
| Age (years)                                                                                                                                                                                                                                                                                                                                                                                                                                                                                                                                                                                                                                                           |                               |
| 65                                                                                                                                                                                                                                                                                                                                                                                                                                                                                                                                                                                                                                                                    | 1                             |
| 65–80                                                                                                                                                                                                                                                                                                                                                                                                                                                                                                                                                                                                                                                                 | 0.66 (0.47 to 0.92)           |
| 80–85                                                                                                                                                                                                                                                                                                                                                                                                                                                                                                                                                                                                                                                                 | 0.71 (0.48 to 1.07)           |
| > 85                                                                                                                                                                                                                                                                                                                                                                                                                                                                                                                                                                                                                                                                  | 1.02 (0.66 to 1.59)           |
| Medical history*                                                                                                                                                                                                                                                                                                                                                                                                                                                                                                                                                                                                                                                      |                               |
| Congestive heart failure                                                                                                                                                                                                                                                                                                                                                                                                                                                                                                                                                                                                                                              | 0.88 (0.58 to 1.34)           |
| Hypertension (history or > 140/90 mm Hg)                                                                                                                                                                                                                                                                                                                                                                                                                                                                                                                                                                                                                              | 1.23 (0.93 to 1.62)           |
| Diabetes                                                                                                                                                                                                                                                                                                                                                                                                                                                                                                                                                                                                                                                              | 0.78 (0.59 to 1.02)           |
| Coronary artery disease                                                                                                                                                                                                                                                                                                                                                                                                                                                                                                                                                                                                                                               | 1.14 (0.80 to 1.65)           |
| Vascular disease                                                                                                                                                                                                                                                                                                                                                                                                                                                                                                                                                                                                                                                      | 1.14 (0.76 to 1.71)           |
| Dementia                                                                                                                                                                                                                                                                                                                                                                                                                                                                                                                                                                                                                                                              | 3.58 (1.15 to 11.15)          |
| Moderate-to-severe CKD†                                                                                                                                                                                                                                                                                                                                                                                                                                                                                                                                                                                                                                               | 0.85 (0.65 to 1.10)           |
| NSAID usage                                                                                                                                                                                                                                                                                                                                                                                                                                                                                                                                                                                                                                                           | 0.57 (0.44 to 0.74)           |
| Bleeding                                                                                                                                                                                                                                                                                                                                                                                                                                                                                                                                                                                                                                                              | 1.90 (0.86 to 4.19)           |
| Previous stroke/TIA/SE                                                                                                                                                                                                                                                                                                                                                                                                                                                                                                                                                                                                                                                | 1.29 (0.96 to 1.75)           |
| Smoking                                                                                                                                                                                                                                                                                                                                                                                                                                                                                                                                                                                                                                                               |                               |
| Never                                                                                                                                                                                                                                                                                                                                                                                                                                                                                                                                                                                                                                                                 | 1                             |
| Ex-smoker                                                                                                                                                                                                                                                                                                                                                                                                                                                                                                                                                                                                                                                             | 1.03 (0.82 to 1.29)           |
| Current smoker                                                                                                                                                                                                                                                                                                                                                                                                                                                                                                                                                                                                                                                        | 0.61 (0.38 to 0.97)           |
| Cohort                                                                                                                                                                                                                                                                                                                                                                                                                                                                                                                                                                                                                                                                |                               |
| 2                                                                                                                                                                                                                                                                                                                                                                                                                                                                                                                                                                                                                                                                     | 1                             |
| 3                                                                                                                                                                                                                                                                                                                                                                                                                                                                                                                                                                                                                                                                     | 6.14 (3.28 to 11.52)          |
| 4                                                                                                                                                                                                                                                                                                                                                                                                                                                                                                                                                                                                                                                                     | 7.24 (9.43 to 31.53)          |
| 5                                                                                                                                                                                                                                                                                                                                                                                                                                                                                                                                                                                                                                                                     | 55.21 (30.29 to 100.62)       |
| <p>*Reference group is patients with no history of disease (for congestive heart failure, hypertension, diabetes, coronary artery disease, vascular disease, dementia, moderate to severe CKD, NSAID usage, bleeding, previous stroke/TIA/SE)</p> <p>CKD, chronic kidney disease; TIA, transient ischaemic attack, SE, systemic embolism</p> <p>† Includes NKF KDOQI stages III–V; none or mild (reference group) includes all other patients</p> <p>NB An OR &gt; 1 implies that NOACs are more frequent than VKAs, while an OR &lt; 1 means that VKAs are more frequent than NOACs. No interaction between cohort and covariates was statistically significant.</p> |                               |

Table 5. Main reason anticoagulant not used in patients with CHA<sub>2</sub>DS<sub>2</sub>VASc ≥ 2

| Variable                                                              | Cohort 2<br>(N=307)<br>n % | Cohort 3<br>(N =279)<br>n % | Cohort 4<br>(N =171)<br>n % | Cohort 5<br>(N =170)<br>n % |
|-----------------------------------------------------------------------|----------------------------|-----------------------------|-----------------------------|-----------------------------|
| Main reason anticoagulant not used*                                   |                            |                             |                             |                             |
| Already taking anti-platelet drugs for other medical condition        | 30 (9.8)                   | 11 (3.9)                    | 5 (2.9)                     | 9 (5.3)                     |
| Patient refusal                                                       | 44 (14.3)                  | 51 (18.3)                   | 24 (14.0)                   | 19 (11.2)                   |
| Previous bleeding event                                               | 6 (2.0)                    | 5 (1.8)                     | 7 (4.1)                     | 5 (2.9)                     |
| Taking medication contraindicated or cautioned for use with VKA or AC | 1 (0.3)                    | 2 (0.7)                     | 1 (0.6)                     | 2 (1.2)                     |
| Other                                                                 | 113 (36.8)                 | 100 (35.8)                  | 73 (42.7)                   | 79 (46.5)                   |
| Unknown                                                               | 70 (22.8)                  | 72 (25.8)                   | 46 (26.9)                   | 36 (21.2)                   |
| Physician's choice**                                                  | 43 (14.0)                  | 38 (13.6)                   | 15 (8.8)                    | 20 (11.8)                   |
| Bleeding risk                                                         | 8 (18.6)                   | 10 (26.3)                   | 9 (60.0)                    | 13 (65.0)                   |
| Concern over patient compliance                                       | 3 (7.0)                    | 1 (2.6)                     | -                           | -                           |
| Guideline recommendation                                              | 8 (18.6)                   | 6 (15.8)                    | 1 (6.7)                     | 1 (5.0)                     |
| Fall risk                                                             | 13 (30.2)                  | 12 (31.6)                   | 2 (13.3)                    | 5 (25.0)                    |
| Low risk of stroke                                                    | 11 (25.6)                  | 9 (23.7)                    | 3 (20.0)                    | 1 (5.0)                     |

\*Percentages are calculated with the column "N" as denominator;

\*\* Percentages in each category of the Physician's choice are calculated with the available (non-missing) data of the variable as denominator.



# BMJ Open

## Temporal trends in antithrombotic treatment of real-world UK patients with newly diagnosed atrial fibrillation: findings from the GARFIELD-AF registry

|                                 |                                                                                                                                                                                                                          |
|---------------------------------|--------------------------------------------------------------------------------------------------------------------------------------------------------------------------------------------------------------------------|
| Journal:                        | <i>BMJ Open</i>                                                                                                                                                                                                          |
| Manuscript ID                   | bmjopen-2017-018905.R1                                                                                                                                                                                                   |
| Article Type:                   | Research                                                                                                                                                                                                                 |
| Date Submitted by the Author:   | 25-Sep-2017                                                                                                                                                                                                              |
| Complete List of Authors:       | Apenteng, Patricia; University of Warwick Warwick Medical School, Gao, Haiyan; Thrombosis Research Institute<br>Hobbs, Richard; University of Oxford<br>Fitzmaurice, David; University of Warwick Warwick Medical School |
| <b>Primary Subject Heading</b>: | Cardiovascular medicine                                                                                                                                                                                                  |
| Secondary Subject Heading:      | Cardiovascular medicine                                                                                                                                                                                                  |
| Keywords:                       | atrial fibrillation, antithrombotic therapy, Anticoagulation < HAEMATOLOGY, newly diagnosed, stroke prophylaxis                                                                                                          |
|                                 |                                                                                                                                                                                                                          |

SCHOLARONE™  
Manuscripts

1  
2  
3 **Temporal trends in antithrombotic treatment of real-world UK patients with newly diagnosed**  
4 **atrial fibrillation: findings from the GARFIELD-AF registry**  
5  
6  
7

8 **Authors**  
9

10 Patricia N Apenteng<sup>1</sup>, Haiyan Gao<sup>2</sup>, F D Richard Hobbs<sup>3</sup>, David A Fitzmaurice<sup>1\*</sup> on behalf of UK  
11 GARFIELD-AF Investigators† and GARFIELD-AF Steering Committee  
12

13  
14  
15  
16 <sup>1</sup>Clinical Trials Unit, Warwick Medical School, University of Warwick, Coventry, Birmingham, UK

17  
18 <sup>2</sup>Thrombosis Research Institute, London, UK

19  
20 <sup>3</sup>Nuffield Department of Primary Care Health Sciences, University of Oxford, Oxford, UK  
21

22  
23  
24 †A full list of the UK GARFIELD-AF Investigators is given in the Appendix.  
25

26  
27  
28 \*Correspondence  
29

30 Patricia Apenteng  
31

32 Clinical Trials Unit, Warwick Medical School, University of Warwick, Coventry CV4 7AL, UK  
33

34 Email [p.apenteng@warwick.ac.uk](mailto:p.apenteng@warwick.ac.uk)  
35

36 Tel: +44 (0)24 76572815  
37  
38  
39  
40  
41

42 Word count (excluding abstract): 3,394  
43  
44  
45  
46  
47  
48  
49  
50  
51  
52  
53  
54  
55  
56  
57  
58  
59  
60

**Abstract**

**Objective** To investigate evolving patterns in antithrombotic treatment in UK patients with newly diagnosed non-valvular atrial fibrillation (AF).

**Design** Prospective, multicentre, international registry

**Setting** 186 primary care practices in the UK

**Participants** 3482 participants prospectively enrolled in four sequential cohorts (cohort 2 {C2} n=830, diagnosed September 2011 to April 2013; cohort 3 {C3} n=902, diagnosed April 2013 to June 2014; cohort 4 {C4} n=850, diagnosed July 2014 to June 2015; cohort 5 {C5} n=900, diagnosed June 2015 to July 2016). Participants were newly diagnosed with non-valvular AF, aged  $\geq 18$  and provided informed consent.

**Main outcome measures** Antithrombotic treatment initiated at diagnosis, overall and according to stroke and bleeding risks. Stroke risk was retrospectively calculated using CHA<sub>2</sub>DS<sub>2</sub>-VASc and bleeding risk using HAS-BLED.

**Results** 42.7% were female and the mean age was 74.5 years. The median CHA<sub>2</sub>DS<sub>2</sub>-VASc score was 3 in all cohorts and the median HAS-BLED score was 2 in all cohorts. There was a statistically significant increase in the use of anticoagulant therapy from C2 to C5 (C2 54.7%, C3 60.3%, C4 73.1%, C5 73.9%; p for trend <0.0001). The increase in the use of anticoagulant was mainly in patients with CHA<sub>2</sub>DS<sub>2</sub>-VASc  $\geq 2$ . The use of vitamin K antagonists (VKA)  $\pm$  antiplatelet drugs (AP) decreased from C2 to C5 (C2 53.3%, C3 52.1%, C4 50.3%, C5 30.6%), while the use of non-vitamin K antagonist oral anticoagulants (NOACs)  $\pm$  AP increased (C2 1.3%, C3 8.0%, C4 22.7%, C5 43.3%). The use of AP only decreased (C2 36.4%, C3 25.5%, C4 11.9%, C5 10.5%), as did the combination therapy of VKA + AP (C2 13.5%, C3 10.8%, C4 9.5%, C5 5.8%).

**Conclusion** There has been a progressive increase in the proportion of patients newly diagnosed with AF receiving guideline-recommended therapy in the UK, potentially driven by the availability of NOACs.

**Trial registration** ClinicalTrials.gov: NCT01090362

**Article summary***Strengths and limitations of the study*

- This study describes real world clinical practice in the UK for treatment initiated at AF diagnosis in patients with AF and at least one risk factor for stroke
- Eligible patients were enrolled prospectively and consecutively without exclusions according to comorbidities or treatment
- Patients were recruited in primary care in the UK, encompassing patients diagnosed in a comprehensive range of national care settings
- Does not include patients without capacity to consent

For peer review only

## Introduction

Atrial fibrillation (AF) is a potent risk factor for stroke and mortality; people with AF have a fivefold increased risk of stroke and a twofold increased risk of death.<sup>1,2</sup> AF-related strokes are more serious and are more likely to be fatal or lead to long-term disability than strokes in people without this arrhythmia.<sup>3</sup> Stroke prevention is therefore a principal goal in the treatment of AF,<sup>4</sup> and a major public health priority<sup>5</sup>. Fortunately, there are effective therapies, with anticoagulation shown to mitigate up to two-thirds of this stroke risk.

Since 2010, changes in treatment guidelines from European Society of Cardiology (ESC) and National Institute for Clinical Excellence (NICE) have widened the criteria for patients with AF that should be considered for antithrombotic therapy and now advocate anticoagulants (ACs) as the only appropriate antithrombotic therapy in patients with AF.<sup>4,5</sup> ACs include vitamin K antagonists (VKAs; typically warfarin) and recently, non-VKA oral anticoagulants (NOACs), comprising factor Xa inhibitors and direct thrombin inhibitors. Whereas the only anticoagulant previously recommended was warfarin, the updated AF guidelines from NICE include recommendations for NOACs for patients with non-valvular AF.

In 2014, NICE updated its guidelines on the management of AF, recommending the CHA<sub>2</sub>DS<sub>2</sub>-VASc stroke risk tool for assessing stroke risk in patients with AF, and further recommending anticoagulation therapy for patients at high risk (CHA<sub>2</sub>DS<sub>2</sub>-VASc  $\geq$  2), a consideration of anticoagulant therapy for patients at moderate risk (CHA<sub>2</sub>DS<sub>2</sub>-VASc = 1), and no anticoagulant or antiplatelet treatment for patients at low risk (defined as CHA<sub>2</sub>DS<sub>2</sub>-VASc = 0 for men and CHA<sub>2</sub>DS<sub>2</sub>-VASc = 1 for women).<sup>5</sup> In addition, the emergence of NOACs in the UK since 2012 has provided a wider range of anticoagulant options, particularly for patients for whom warfarin may not be appropriate. The change in guidelines coupled with the emergence of NOACs has the potential to transform clinical practice; however, the impact on utilisation of anticoagulants in patients with AF in the UK is unclear.

More than 46,000 new cases of AF are diagnosed in the UK every year. Many studies have reported a longstanding problem of under-treatment with anticoagulants of patients at high risk of stroke<sup>6,7</sup>; UK studies in the last decade also report suboptimal treatment<sup>8-11</sup>, though there is limited evidence of AF management since the introduction of NOACs. Little is known about the contemporary real-world management of patients newly diagnosed with AF who are perceived to be at risk of stroke by their physicians. The Global Anticoagulant Registry in the FIELD—Atrial Fibrillation (GARFIELD-AF) aims to determine real-life treatment patterns and clinical outcomes of patients with newly diagnosed with non-valvular AF and at least one investigator-determined risk factor for stroke<sup>12,13</sup>. This paper investigates the evolving patterns of antithrombotic treatment of UK patients enrolled in the GARFIELD-AF registry from September 2011 to July 2016.

## Methods

### *Study design*

1  
2  
3 GARFIELD-AF is an ongoing, prospective, non-interventional, international registry of adults ( $\geq 18$   
4 years) diagnosed with AF. Patients were recruited into five independent cohorts; the first cohort also  
5 included a validation cohort of retrospective patients.  
6

### 7 *Participants*

8  
9  
10 Inclusion criteria for the prospective cohort comprised a new diagnosis of non-valvular AF of up to 6  
11 weeks prior to entry into the registry and an investigator-determined risk factor for stroke. Eligible  
12 patients were recruited consecutively at participating sites in order to prevent selection bias. The  
13 retrospective cohort comprised patients diagnosed 6–24 months before enrolment. Patients are  
14 followed up for a minimum of 2 years. Patients with transient AF, secondary to a reversible cause,  
15 and patients for whom follow-up was not possible were excluded from the registry. Full methods of  
16 the GARFIELD-AF registry have been previously reported.<sup>12 13</sup>  
17

18  
19 This paper reports baseline characteristics and treatment patterns in UK participants enrolled into  
20 cohorts 2 to 5; participants enrolled into cohort 1 were excluded as it consisted predominantly of a  
21 retrospective validation cohort.  
22

### 23 *Setting*

24  
25 UK enrolment into cohorts 2 to 5 was undertaken between September 2011 and July 2016 at 186  
26 general practices (GPs) across the UK (161 in England, 8 in Wales, 8 in Northern Ireland and 9 in  
27 Scotland). The necessary regulatory approvals were obtained prior to recruitment and all patients  
28 provided written informed consent prior to enrolment into the registry. The standard national  
29 diagnostic criteria for AF apply for GARFIELD-AF, and for the UK this was by electrocardiogram  
30 confirmation.  
31  
32

### 33 *Data sources*

34  
35 Data collected at baseline comprised: demographics; body mass index; type of AF; care setting of  
36 diagnosis; treatment strategy initiated at diagnosis; reason for treatment decision; and medical  
37 history. Data were collected through review of medical records by trained site staff using an  
38 electronic case report form (eCRF).  
39  
40

41  
42 Stroke risk was calculated retrospectively using CHA<sub>2</sub>DS<sub>2</sub>-VASc score based variables: heart failure,  
43 hypertension, age  $\geq 75$  years and 65–74 years, diabetes mellitus, prior stroke or transient ischaemic  
44 attack (TIA), left ventricular ejection fraction  $< 40\%$ , prior thromboembolism, vascular disease, and  
45 female gender. HAS-BLED scores were calculated retrospectively using the variables hypertension,  
46 abnormal renal/liver function, stroke, bleeding history or predisposition, elderly ( $> 65$ ), and  
47 drugs/alcohol concomitantly.  
48

49  
50 Data for the analysis in this report were extracted from the study database on 28 July 2016.  
51

### 52 *Definitions*

53  
54 ACs include VKAs and NOACs. NOACs include oral direct factor Xa inhibitors (FXAs) and oral direct  
55 thrombin inhibitors (DTIs).  
56  
57  
58  
59  
60

1  
2  
3 Vascular disease was defined as peripheral artery disease and/or coronary artery disease (CAD) with  
4 a history of acute coronary syndromes. Hypertension was defined as a documented history of  
5 hypertension or blood pressure > 140/90 mm Hg. Chronic kidney disease (CKD) was classified  
6 according to the National Kidney Foundation's Kidney Disease Outcomes Quality Initiative (NKF  
7 KDOQI) guidelines<sup>14</sup>: moderate to severe includes stages III to V; none or mild includes all other  
8 patients.  
9

### 10 11 *Statistical analysis*

12  
13 Patient characteristics and medical history are described by cohort. Continuous variables are  
14 expressed as number of patients and mean  $\pm$  standard deviation (SD) and or median and  
15 interquartile range. Categorical variables are expressed as frequencies and percentages. Treatment  
16 patterns were analysed by cohort, and by cohort and CHA<sub>2</sub>DS<sub>2</sub>-VASc or HAS-BLED. Trends were  
17 assessed using an extension of the Wilcoxon rank-sum test.  
18  
19

20  
21 Logistic regression models were used to assess the risk factors associated with the prescribing of  
22 NOACs (versus VKA). The following risk factors were included in the model: gender, age group, race,  
23 smoking, congestive heart failure (CHF), hypertension, diabetes, CAD, vascular disease, dementia,  
24 moderate-to-severe CKD, non-steroidal anti-inflammatory drug (NSAID) usage, history of bleeding,  
25 previous stroke/TIA/systemic embolism (SE), and cohort. Odds ratios (ORs) with 95% confidence  
26 intervals (CIs) were estimated to describe the associations of the risk factors and prescribing of  
27 NOACs versus VKA, as well as antiplatelet and no treatment (No ACs) versus anticoagulant (ACs).  
28  
29

30  
31 Multiple Imputation by Chained Equations (MICE) was used to fill in missing values, creating five  
32 complete datasets<sup>15 16</sup>. Logistic regression was performed using the imputed datasets. First-degree  
33 interaction between comorbidities and time (cohort) was tested using likelihood ratio tests. Only  
34 significant interactions were included in the final model.  
35

36  
37 Statistical analysis was performed using both SAS software version 9.4 (SAS Institute Inc, Cary, NC,  
38 USA) and Stata Statistical Software: Release 14 (StataCorp, College Station, TX, USA).  
39  
40

## 41 **Results**

### 42 43 *Patient distribution and characteristics*

44  
45 In the UK, 3482 patients were enrolled into cohorts 2 to 5 between September 2011 and July 2016:  
46 cohort 2 (C2) consisted of 830 patients diagnosed with AF between September 2011 and April 2013,  
47 cohort 3 (C3) consisted of 902 patients diagnosed between April 2013 and June 2014, cohort 4 (C4)  
48 consisted of 850 patients diagnosed between July 2014 and June 2015, and cohort 5 (C5) consisted  
49 of 900 patients diagnosed between June 2015 and July 2016. Overall, 42.7% of patients were female,  
50 mean age (SD) at diagnosis was 74.5 years (9.5) and 89.7% had a CHA<sub>2</sub>DS<sub>2</sub>-VASc score of  $\geq 2$  (Table  
51 1).  
52  
53  
54  
55  
56  
57  
58  
59  
60

Table 1. Baseline characteristics of patients in cohorts 2 to 5

| Variable                                             | Cohort 2<br>(N=830)<br>(n %)<br>(2011 – 2013) | Cohort 3<br>(N=902)<br>(n %)<br>(2013 – 2014) | Cohort 4<br>(N=850)<br>(n %)<br>(2014 - 2015) | Cohort 5<br>(N=900)<br>(n %)<br>(2015 – 2016) | Total<br>C2 to C5<br>(N=3482)<br>(n %) |
|------------------------------------------------------|-----------------------------------------------|-----------------------------------------------|-----------------------------------------------|-----------------------------------------------|----------------------------------------|
| Female, n/N (%)                                      | 376/850 (45.3)                                | 391/902 (43.3)                                | 343/850 (40.4)                                | 378/900 (42.0)                                | 1488/3482 (42.7)                       |
| Age at diagnosis, years, mean (SD)                   | 75.2 (9.7)                                    | 73.8 (9.7)                                    | 74.2 (9.6)                                    | 74.8 (9.0)                                    | 74.5 (9.5)                             |
| Age at diagnosis, years, median (IQR)                | 77.0 (70.0 to 82.0)                           | 75.0 (68.0 to 81.0)                           | 75.0 (69.0 to 81.0)                           | 75.0 (69.0 to 81.0)                           | 75.0 (69.0 to 81.0)                    |
| Age group, n/N (%)                                   |                                               |                                               |                                               |                                               |                                        |
| < 65                                                 | 110/830 (13.3)                                | 133/902 (14.7)                                | 116/850 (13.6)                                | 96/900 (10.7)                                 | 455/3482 (13.1)                        |
| 65–74                                                | 222/830 (26.7)                                | 315/902 (34.9)                                | 293/850 (34.5)                                | 322/900 (35.8)                                | 1152/3482 (33.1)                       |
| ≥ 75                                                 | 498/830 (60.0)                                | 454/902 (50.3)                                | 441/850 (51.9)                                | 482/900 (53.6)                                | 1875/3482 (53.8)                       |
| Caucasian race, n/N (%)                              | 804/816 (98.5) <sup>a</sup>                   | 867/884 (98.1) <sup>b</sup>                   | 832/837 (99.4) <sup>c</sup>                   | 853/860 (99.2) <sup>d</sup>                   | 3356/3397 (98.8) <sup>e</sup>          |
| Medical history, n/N (%)                             |                                               |                                               |                                               |                                               |                                        |
| Congestive heart failure                             | 70/830 (8.4)                                  | 69/902 (7.6)                                  | 56/850 (6.6)                                  | 57/900 (6.3)                                  | 252/3482 (7.2)                         |
| Coronary artery disease                              | 166/830 (20.0)                                | 165/902 (18.3)                                | 164/850 (19.3)                                | 174/900 (19.3)                                | 669/3482 (19.2)                        |
| Acute coronary syndrome                              | 87/830 (10.5)                                 | 74/896 (8.3) <sup>f</sup>                     | 90/847 (10.6) <sup>g</sup>                    | 89/897 (9.9) <sup>h</sup>                     | 340/3470 (9.8) <sup>i</sup>            |
| Vascular disease                                     | 109/830 (13.1)                                | 112 (12.5) <sup>j</sup>                       | 125 (14.7) <sup>k</sup>                       | 125 (13.9) <sup>l</sup>                       | 471 (13.6) <sup>m</sup>                |
| Systemic embolism                                    | 9 (1.1)                                       | 4 (0.4)                                       | 3 (0.4)                                       | 6 (0.7)                                       | 22 (0.6)                               |
| Stroke/TIA                                           | 101 (12.2)                                    | 105 (11.6)                                    | 116 (13.6)                                    | 106 (11.8)                                    | 428 (12.3)                             |
| History of bleeding                                  | 28 (3.4)                                      | 26 (2.9)                                      | 23 (2.7)                                      | 27 (3.0)                                      | 104 (3.0)                              |
| Hypertension                                         | 10 (90.9)                                     | 48 (65.8)                                     | 139 (72.8)                                    | 276 (71.1)                                    | 473 (71.3)                             |
| Diabetes mellitus                                    | 136 (16.4)                                    | 156 (17.3)                                    | 168 (19.8)                                    | 154 (17.1)                                    | 614 (17.6)                             |
| Moderate-to-severe CKD*                              | 244 (29.4)                                    | 241 (26.7)                                    | 199 (23.4)                                    | 196 (21.8)                                    | 880 (25.3)                             |
| Risk scores                                          |                                               |                                               |                                               |                                               |                                        |
| CHA <sub>2</sub> DS <sub>2</sub> -VASc, median (IQR) | 3.0 (2.0 to 4.0) <sup>n</sup>                 | 3.0 (2.0 to 4.0) <sup>o</sup>                 | 3.0 (2.0 to 4.0) <sup>p</sup>                 | 3.0 (2.0 to 4.0) <sup>q</sup>                 | 3.0 (2.0 to 4.0) <sup>r</sup>          |
| CHA <sub>2</sub> DS <sub>2</sub> -VASc, 0–1, n/N (%) | 73/795 (9.2)                                  | 93/844 (11.0)                                 | 90/801 (11.2)                                 | 81/835 (9.7)                                  | 337/3275 (10.3)                        |
| HAS-BLED, median (IQR) <sup>†</sup>                  | 2.0 (1.0 to 2.0) <sup>s</sup>                 | 2.0 (1.0 to 2.0) <sup>t</sup>                 | 2.0 (1.0 to 2.0) <sup>u</sup>                 | 2.0 (1.0 to 2.0) <sup>v</sup>                 | 2.0 (1.0 to 2.0) <sup>w</sup>          |
| HAS-BLED, 0–2, n/N (%) <sup>‡</sup>                  | 437/574 (76.1)                                | 510/641 (79.6)                                | 535/638 (83.9)                                | 524/615 (85.2)                                | 2006/2468 (81.3)                       |

Patients missing: <sup>a</sup>14, <sup>b</sup>18, <sup>c</sup>13, <sup>d</sup>40, <sup>e</sup>85, <sup>f</sup>6, <sup>g</sup>3, <sup>h</sup>3, <sup>i</sup>12, <sup>j</sup>7, <sup>k</sup>2, <sup>l</sup>1, <sup>m</sup>11, <sup>n</sup>35, <sup>o</sup>58, <sup>p</sup>49, <sup>q</sup>65, <sup>r</sup>207, <sup>s</sup>256, <sup>t</sup>261, <sup>u</sup>212, <sup>v</sup>285, <sup>w</sup>1014

TIA, transient ischaemic attack; CKD, chronic kidney disease; \*Includes NKF KDOQI stages III–V; NKF KDOQI, National Kidney Foundation's Kidney Disease Outcomes Quality Initiative, CHA<sub>2</sub>DS<sub>2</sub>-VASc, cardiac failure, hypertension, age ≥ 75 (doubled), diabetes, stroke (doubled)-vascular disease, age 65–74 and sex category (female); HAS-BLED: hypertension, abnormal renal/liver function (1 point each), stroke, bleeding history or predisposition, elderly (> 65), drugs/alcohol concomitantly (1 point each)



1  
2  
3  
4  
5  
6  
7 Participants were diagnosed in a broad range of care settings representative of those in the UK:  
8 more than half of the patients (2124/3482; 61.0%) were diagnosed in primary care. The remainder  
9 were diagnosed in internal (general) medicine (21.9%), cardiology (15.2%), geriatrics (1.8%), and  
10 neurology (0.1%). Of the 3482 participants, 1370 (39.3%) had new or unclassified AF, 640/3482  
11 (18.4%) had paroxysmal AF, 272/3482 (7.8%) had persistent AF and 1200/3482 (34.5%) had  
12 permanent AF. There were some variations in baseline characteristics across the four cohorts (Table  
13 1), though the median CHA<sub>2</sub>DS<sub>2</sub>-VAsC and HAS-BLED scores were similar.

#### 14 15 16 *Antithrombotic therapy use by cohort*

17  
18 Figure 1 shows the treatment patterns at diagnosis in each of the four cohorts. The proportion of  
19 patients prescribed AC therapy at diagnosis, with or without an antiplatelet (AP), increased  
20 consistently from C2 to C5 (54.7%, 60.3%, 73.1% and 73.9%; p for trend < 0.0001), whereas the use  
21 of AP only decreased (36.4%, 25.5%, 11.9% and 10.5%). At the same time, there was an increase in  
22 the proportion of patients receiving NOACs with or without AP from C2 to C5 (1.3%, 8.1%, 22.7%,  
23 43.3%); the proportion of patients not receiving any antithrombotic therapy increased from C2 to C4  
24 (8.9%, 14.4%, 15.1%) then stayed similar in C5 (15.7%). Co-prescription of AC and AP was variable  
25 (C2 14.0%, C3 11.8%, C4 11.4%, C5 11.7%). Table 2 shows selected baseline characteristics for all  
26 patients (C2 to C5 combined) according to treatment group. Patients receiving no treatment  
27 generally had a lower incidence of comorbidities, apart from history of bleeding; however, patients  
28 aged ≥ 75 years were more likely not to receive treatment.  
29  
30  
31  
32  
33  
34  
35  
36  
37  
38  
39  
40  
41  
42  
43  
44  
45  
46  
47  
48  
49  
50  
51  
52  
53  
54  
55  
56  
57  
58  
59  
60

Table 2. Baseline characteristics of patients in cohort 2 to 5 by antithrombotic treatment type

|                                                      | None<br>(N=470)  | AP alone<br>(N=725) | VKA alone<br>(N=1267) | NOAC alone<br>(N=587) | AC + AP<br>(N=425) | AC ± AP<br>(N=2279) |
|------------------------------------------------------|------------------|---------------------|-----------------------|-----------------------|--------------------|---------------------|
| Female, n (%)                                        | 201 (42.8)       | 291 (40.1)          | 565 (44.6)            | 262 (44.6)            | 167 (39.3)         | 994 (43.6)          |
| Age, mean (SD)                                       | 73.3 (10.5)      | 75.3 (9.7)          | 74.2 (9.4)            | 75.0 (9.4)            | 74.7 (8.2)         | 74.5 (9.2)          |
| Age 65–74, n (%)                                     | 153 (32.6)       | 217 (29.9)          | 430 (33.9)            | 198 (33.7)            | 150 (35.3)         | 778 (34.1)          |
| Age ≥ 75, n (%)                                      | 227 (48.3)       | 417 (57.5)          | 676 (53.4)            | 319 (54.3)            | 234 (55.1)         | 1229 (53.9)         |
| Medical history, n (%)                               |                  |                     |                       |                       |                    |                     |
| Heart failure (any)                                  | 22 (4.7)         | 46 (6.3)            | 97 (7.7)              | 36 (6.1)              | 49 (11.5)          | 182 (8.0)           |
| Hypertension (any)                                   | 325 (78.1)       | 531 (77.7)          | 961 (79.2)            | 451 (80.0)            | 331 (80.3)         | 1743 (79.6)         |
| Diabetes mellitus                                    | 51 (10.9)        | 105 (14.5)          | 249 (19.7)            | 94 (16.0)             | 112 (26.4)         | 455 (20.0)          |
| Stroke                                               | 12 (2.6)         | 55 (7.6)            | 78 (6.2)              | 46 (7.8)              | 52 (12.2)          | 176 (7.7)           |
| Systemic embolism                                    | -                | 5 (0.7)             | 12 (1.0)              | 1 (0.2)               | 4 (1.0)            | 17 (0.8)            |
| CAD (any)                                            | 37 (7.9)         | 187 (25.8)          | 168 (13.3)            | 90 (15.3)             | 182 (42.8)         | 440 (19.3)          |
| Vascular disease                                     | 23 (4.9)         | 120 (16.6)          | 125 (9.9)             | 64 (10.9)             | 137 (32.5)         | 326 (14.4)          |
| History of bleeding                                  | 34 (7.3)         | 35 (4.9)            | 14 (1.1)              | 15 (2.6)              | 6 (1.4)            | 35 (1.5)            |
| Moderate-to-severe CKD* (stages 3–5)                 | 94 (20.0)        | 208 (28.7)          | 331 (26.1)            | 128 (21.8)            | 117 (27.5)         | 576 (25.3)          |
| Risk scores                                          |                  |                     |                       |                       |                    |                     |
| CHA <sub>2</sub> DS <sub>2</sub> -VASc, mean (SD)    | 2.8 (1.4)        | 3.3 (1.5)           | 3.3 (1.4)             | 3.3 (1.4)             | 3.8 (1.5)          | 3.4 (1.4)           |
| CHA <sub>2</sub> DS <sub>2</sub> -VASc, median (IQR) | 3.0 (2.0 to 4.0) | 3.0 (2.0 to 4.0)    | 3.0 (2.0 to 4.0)      | 3.0 (2.0 to 4.0)      | 4.0 (3.0 to 5.0)   | 3.0 (2.0 to 4.0)    |
| CHA <sub>2</sub> DS <sub>2</sub> -VASc, 0–1, n (%)   | 75 (18.1)        | 73 (10.8)           | 107 (8.9)             | 57 (10.1)             | 24 (5.9)           | 188 (8.6)           |
| HAS-BLED, mean (SD)                                  | 1.4 (0.9)        | 2.4 (0.8)           | 1.4 (0.8)             | 1.4 (0.8)             | 2.4 (0.8)          | 1.6 (0.9)           |
| HAS-BLED, median (IQR)                               | 1.0 (1.0 to 2.0) | 2.0 (2.0 to 3.0)    | 1.0 (1.0 to 2.0)      | 1.0 (1.0 to 2.0)      | 2.0 (2.0 to 3.0)   | 2.0 (1.0 to 2.0)    |
| HAS-BLED, 0–2, n (%)                                 | 249 (88.7)       | 306 (61.3)          | 855 (90.2)            | 398 (91.9)            | 193 (63.9)         | 1446 (85.8)         |

AC, anticoagulant; AP, antiplatelet; CAD, coronary artery disease; CKD, chronic kidney disease; \*Includes NKF KDOQI stages III–V NKF KDOQI, National Kidney Foundation's Kidney Disease Outcomes Quality Initiative; NOAC, non-vitamin K antagonist oral anticoagulant; VKA, vitamin K antagonist

CHA<sub>2</sub>DS<sub>2</sub>-VASc, cardiac failure, hypertension, age ≥ 75 (doubled), diabetes, stroke (doubled)-vascular disease, age 65–74 and sex category (female); HAS-BLED: hypertension, abnormal renal/liver function (1 point each), stroke, bleeding history or predisposition, elderly (> 65), drugs/alcohol concomitantly (1 point each)

Overall, 19.1% (666/3482) of patients were prescribed NOACs. Table 3 shows the baseline characteristics of patients on NOACs by cohort. There were no clear patterns of NOACs use by patient characteristics; however, patients diagnosed in cardiology in the earlier cohorts were more likely to be given NOACs than those in the later cohorts, whilst among patients diagnosed in primary care the later cohorts were more likely to receive NOACs than earlier cohorts. Of the patients prescribed either NOACs or VKA, those with dementia were significantly more likely to receive NOACs than VKA compared to patients without a history of the condition (Table 4). Also, patients were more likely to receive NOACs over VKA as the cohorts progressed, from C2 to C5; however, no interaction between cohort and covariates was statistically significant.

Table 3. Baseline characteristics of patients on NOACs by cohort

| Variable                                             | Cohort 2<br>(N=11)     | Cohort 3<br>(N=73)     | Cohort 4<br>(N=193)    | Cohort 5<br>(N=389)    | Total<br>C2 to C5<br>(N=666) |
|------------------------------------------------------|------------------------|------------------------|------------------------|------------------------|------------------------------|
| Female, n (%)                                        | 4 (36.4)               | 42 (57.5)              | 80 (41.5)              | 165 (42.4)             | 291 (43.7)                   |
| Age at diagnosis, years, mean (SD)                   | 75.9 (10.3)            | 74.8 (9.2)             | 74.7 (10.1)            | 74.7 (9.0)             | 74.7 (9.4)                   |
| Age at diagnosis, years, median (IQR)                | 75.0 (69.0 to 86.0)    | 74.0 (69.0 to 81.0)    | 76.0 (68.0 to 82.0)    | 75.0 (69.0 to 81.0)    | 75.0 (69.0 to 82.0)          |
| Age group, n (%)                                     |                        |                        |                        |                        |                              |
| Age < 65                                             | 2 (18.2)               | 8 (11.0)               | 30 (15.5)              | 43 (11.1)              | 83 (12.5)                    |
| Age 65–74                                            | 3 (27.3)               | 29 (39.7)              | 59 (30.6)              | 138 (35.5)             | 229 (34.4)                   |
| Age ≥ 75                                             | 6 (54.5)               | 36 (49.3)              | 104 (53.9)             | 208 (53.5)             | 354 (53.2)                   |
| Care setting at diagnosis, n (%)                     |                        |                        |                        |                        |                              |
| Internal medicine                                    | 2 (18.2)               | 18 (24.7)              | 53 (27.5)              | 108 (27.8)             | 181 (27.2)                   |
| Cardiology                                           | 4 (36.4)               | 11 (15.1)              | 21 (10.9)              | 59 (15.2)              | 95 (14.3)                    |
| Neurology                                            | -                      | -                      | 1 (0.5)                | 1 (0.3)                | 2 (0.3)                      |
| Geriatrics                                           | -                      | 2 (2.7)                | 2 (1.0)                | 7 (1.8)                | 11 (1.7)                     |
| Primary care/general practice                        | 5 (45.5)               | 42 (57.5)              | 116 (60.1)             | 214 (55.0)             | 377 (56.6)                   |
| Medical history, n (%)                               |                        |                        |                        |                        |                              |
| Congestive heart failure                             | 2 (18.2)               | 4 (5.5)                | 14 (7.3)               | 23 (5.9)               | 43 (6.5)                     |
| History of hypertension                              | 10 (90.9)              | 48 (65.8)              | 139 (72.8)             | 276 (71.1)             | 473 (71.3)                   |
| Diabetes mellitus                                    | 2 (18.2)               | 9 (12.3)               | 35 (18.1)              | 69 (17.7)              | 115 (17.3)                   |
| Stroke                                               | -                      | 7 (9.6)                | 16 (8.3)               | 32 (8.2)               | 55 (8.3)                     |
| Systemic embolism                                    | -                      | -                      | 1 (0.5)                | 2 (0.5)                | 3 (0.5)                      |
| Coronary artery disease                              | 1 (9.1)                | 11 (15.1)              | 43 (22.3)              | 73 (18.8)              | 128 (19.2)                   |
| Vascular disease                                     | 1 (9.1)                | 7 (9.7) <sup>a</sup>   | 37 (19.3) <sup>b</sup> | 50 (12.9)              | 95 (14.3) <sup>c</sup>       |
| History of bleeding                                  | -                      | 3 (4.1)                | 2 (1.0)                | 11 (2.8)               | 16 (2.4)                     |
| Moderate-to-severe CKD                               | -                      | 26 (35.6)              | 47 (24.4)              | 70 (18.0)              | 143 (21.5)                   |
| Risk scores                                          |                        |                        |                        |                        |                              |
| CHA <sub>2</sub> DS <sub>2</sub> -VASC, mean (SD)    | 3.3 (1.7)              | 3.3 (1.4) <sup>d</sup> | 3.4 (1.5) <sup>e</sup> | 3.3 (1.4) <sup>f</sup> | 3.3 (1.5) <sup>g</sup>       |
| CHA <sub>2</sub> DS <sub>2</sub> -VASC, median (IQR) | 4.0 (2.0 to 4.0)       | 3.0 (2.0 to 4.0)             |
| CHA <sub>2</sub> DS <sub>2</sub> -VASC, 0–1, n (%)   | 2 (18.2)               | 7 (9.9)                | 19 (10.4)              | 37 (9.9)               | 65 (10.2)                    |
| HAS-BLED, mean (SD)                                  | 1.2 (0.8) <sup>h</sup> | 1.7 (0.8) <sup>i</sup> | 1.5 (0.8) <sup>j</sup> | 1.4 (0.8) <sup>k</sup> | 1.5 (0.8) <sup>l</sup>       |
| HAS-BLED, median (IQR)                               | 1.0 (1.0 to 2.0)       | 2.0 (1.0 to 2.0)       | 1.0 (1.0 to 2.0)       | 1.0 (1.0 to 2.0)       | 1.0 (1.0 to 2.0)             |
| HAS-BLED, 0–2, n (%)                                 | 6 (100)                | 52 (86.7)              | 129 (89.0)             | 255 (92.4)             | 442 (90.8)                   |

Patients missing: <sup>a</sup>1, <sup>b</sup>1, <sup>c</sup>2, <sup>d</sup>2, <sup>e</sup>10, <sup>f</sup>16, <sup>g</sup>28, <sup>h</sup>5, <sup>i</sup>13, <sup>j</sup>48, <sup>k</sup>113, <sup>l</sup>179

CKD, chronic kidney disease; CHA<sub>2</sub>DS<sub>2</sub>-VASC, cardiac failure, hypertension, age ≥ 75 (doubled), diabetes, stroke (doubled)-vascular disease, age 65–74 and sex category (female); HAS-BLED: hypertension, abnormal renal/liver function (1 point each), stroke, bleeding history or predisposition, elderly (> 65), drugs/alcohol concomitantly (1 point each)

**Table 4. The use of NOACs in relation to baseline characteristics for patients on an AC at baseline**

| Variable                                                                                                                                                                                                                                   | Cohorts 2 to 5<br>OR (95% CI) |
|--------------------------------------------------------------------------------------------------------------------------------------------------------------------------------------------------------------------------------------------|-------------------------------|
| Gender                                                                                                                                                                                                                                     |                               |
| Female                                                                                                                                                                                                                                     | 1                             |
| Male                                                                                                                                                                                                                                       | 0.90 (0.72 to 1.12)           |
| Age (years)                                                                                                                                                                                                                                |                               |
| 65                                                                                                                                                                                                                                         | 1                             |
| 65–80                                                                                                                                                                                                                                      | 0.66 (0.47 to 0.92)           |
| 80–85                                                                                                                                                                                                                                      | 0.71 (0.48 to 1.07)           |
| > 85                                                                                                                                                                                                                                       | 1.02 (0.66 to 1.59)           |
| Medical history*                                                                                                                                                                                                                           |                               |
| Congestive heart failure                                                                                                                                                                                                                   | 0.88 (0.58 to 1.34)           |
| Hypertension (history or > 140/90 mm Hg)                                                                                                                                                                                                   | 1.23 (0.93 to 1.62)           |
| Diabetes                                                                                                                                                                                                                                   | 0.78 (0.59 to 1.02)           |
| Coronary artery disease                                                                                                                                                                                                                    | 1.14 (0.80 to 1.65)           |
| Vascular disease                                                                                                                                                                                                                           | 1.14 (0.76 to 1.71)           |
| Dementia                                                                                                                                                                                                                                   | 3.58 (1.15 to 11.15)          |
| Moderate-to-severe CKD†                                                                                                                                                                                                                    | 0.85 (0.65 to 1.10)           |
| NSAID usage                                                                                                                                                                                                                                | 0.57 (0.44 to 0.74)           |
| Bleeding                                                                                                                                                                                                                                   | 1.90 (0.86 to 4.19)           |
| Previous stroke/TIA/SE                                                                                                                                                                                                                     | 1.29 (0.96 to 1.75)           |
| Smoking                                                                                                                                                                                                                                    |                               |
| Never                                                                                                                                                                                                                                      | 1                             |
| Ex-smoker                                                                                                                                                                                                                                  | 1.03 (0.82 to 1.29)           |
| Current smoker                                                                                                                                                                                                                             | 0.61 (0.38 to 0.97)           |
| Cohort                                                                                                                                                                                                                                     |                               |
| 2                                                                                                                                                                                                                                          | 1                             |
| 3                                                                                                                                                                                                                                          | 6.14 (3.28 to 11.52)          |
| 4                                                                                                                                                                                                                                          | 7.24 (9.43 to 31.53)          |
| 5                                                                                                                                                                                                                                          | 55.21 (30.29 to 100.62)       |
| *Reference group is patients with no history of disease (for congestive heart failure, hypertension, diabetes, coronary artery disease, vascular disease, dementia, moderate to severe CKD, NSAID usage, bleeding, previous stroke/TIA/SE) |                               |
| CKD, chronic kidney disease; TIA, transient ischaemic attack, SE, systemic embolism                                                                                                                                                        |                               |
| † Includes NKF KDOQI stages III–V; none or mild (reference group) includes all other patients                                                                                                                                              |                               |
| NB An OR > 1 implies that NOACs are more frequent than VKAs, while an OR < 1 means that VKAs are more frequent than NOACs. No interaction between cohort and covariates was statistically significant.                                     |                               |

Table 5 shows the baseline characteristics of patients who received no AC therapy by cohort (1195/3482, 34.3%). There were no clear changes over time in 'No AC' use when considering individual patient characteristics. Nevertheless in the whole population, 'No AC' was less likely (relative to AC therapy) in patients aged 65–80 years, with diabetes, or a history of vascular disease and previous stroke/TIA/systemic embolism than in patients without these conditions or other age groups (Table 6). 'No AC' was more likely if patients had a history of bleeding or with NSAID usage. Over time, UK physicians became increasingly less likely to choose 'No-AC' with each successive cohort of patients enrolled between 2011 and 2016.

Table 5. Baseline characteristics of patients not on AC by cohort

| Variable                                             | Cohort 2<br>(N=375)    | Cohort 3<br>(N=356)    | Cohort 4<br>(N=229)    | Cohort 5<br>(N=235)    | Total<br>C2 to C5<br>(N=1195) |
|------------------------------------------------------|------------------------|------------------------|------------------------|------------------------|-------------------------------|
| Female, n (%)                                        | 166 (44.3)             | 140 (39.3)             | 89 (38.9)              | 97 (41.3)              | 492 (41.2)                    |
| Age at diagnosis, years, mean (SD)                   | 75.2 (9.8)             | 74.0 (9.9)             | 73.8 (10.7)            | 74.9 (9.9)             | 74.5 (10.0)                   |
| Age at diagnosis, years, median (IQR)                | 77.0 (69.0 to 82.0)    | 75.0 (69.0 to 81.0)    | 74.0 (68.0 to 81.0)    | 75.0 (69.0 to 82.0)    | 75.0 (69.0 to 82.0)           |
| Age group, n (%)                                     |                        |                        |                        |                        |                               |
| Age < 65                                             | 51 (13.6)              | 60 (16.9)              | 38 (16.6)              | 32 (13.6)              | 181 (15.1)                    |
| Age 65–74                                            | 102 (27.2)             | 114 (32.0)             | 78 (34.1)              | 76 (32.3)              | 370 (31.0)                    |
| Age ≥ 75                                             | 222 (59.2)             | 182 (51.1)             | 113 (49.3)             | 127 (54.0)             | 644 (53.9)                    |
| Care setting at diagnosis, n (%)                     |                        |                        |                        |                        |                               |
| Internal medicine                                    | 66 (17.6)              | 73 (20.5)              | 49 (21.4)              | 37 (15.7)              | 255 (18.8)                    |
| Cardiology                                           | 54 (14.4)              | 53 (14.9)              | 30 (13.1)              | 29 (12.3)              | 166 (13.9)                    |
| Neurology                                            | -                      | -                      | 1 (0.4)                | 1 (0.4)                | 2 (0.2)                       |
| Geriatrics                                           | 7 (1.9)                | 8 (2.2)                | 3 (1.3)                | 4 (1.7)                | 22 (1.8)                      |
| Primary care/general practice                        | 248 (66.1)             | 222 (62.4)             | 146 (63.3)             | 164 (69.8)             | 780 (65.3)                    |
| Medical history, n (%)                               |                        |                        |                        |                        |                               |
| Congestive heart failure                             | 25 (6.7)               | 18 (5.1)               | 10 (4.4)               | 15 (6.4)               | 68 (5.7)                      |
| History of hypertension                              | 269 (71.7)             | 245 (68.8)             | 135 (59.2)             | 141 (60.3)             | 790 (66.2)                    |
| Diabetes mellitus                                    | 46 (12.3)              | 50 (14.0)              | 29 (12.7)              | 31 (13.2)              | 156 (13.1)                    |
| Stroke                                               | 23 (6.1)               | 20 (5.6)               | 7 (3.1)                | 17 (7.2)               | 67 (5.6)                      |
| Systemic embolism                                    | 2 (0.5)                | 2 (0.6)                | -                      | 1 (0.4)                | 5 (0.4)                       |
| Coronary artery disease                              | 80 (21.3)              | 57 (16.0)              | 44 (19.2)              | 43 (18.3)              | 224 (18.7)                    |
| Vascular disease                                     | 46 (12.3)              | 34 (9.6) <sup>a</sup>  | 31 (13.5)              | 32 (13.7) <sup>b</sup> | 143 (12.0) <sup>c</sup>       |
| History of bleeding                                  | 23 (6.1)               | 19 (5.4)               | 13 (5.7)               | 14 (6.0)               | 69 (5.8)                      |
| Moderate-to-severe CKD                               | 108 (28.8)             | 82 (23.0)              | 47 (20.5)              | 65 (27.7)              | 302 (25.3)                    |
| Risk scores                                          |                        |                        |                        |                        |                               |
| CHA <sub>2</sub> DS <sub>2</sub> -VAsC, mean (SD)    | 3.2 (1.5) <sup>d</sup> | 3.0 (1.4) <sup>e</sup> | 3.0 (1.5) <sup>f</sup> | 3.2 (1.5) <sup>g</sup> | 3.1 (1.5) <sup>h</sup>        |
| CHA <sub>2</sub> DS <sub>2</sub> -VAsC, median (IQR) | 3.0 (2.0 to 4.0)              |
| CHA <sub>2</sub> DS <sub>2</sub> -VAsC, 0–1, n (%)   | 41 (11.6)              | 46 (13.8)              | 34 (16.5)              | 27 (13.4)              | 148 (13.5)                    |
| HAS-BLED, mean (SD)                                  | 2.2 (0.9) <sup>i</sup> | 2.1 (0.9) <sup>j</sup> | 1.7 (1.0) <sup>k</sup> | 1.9 (1.1) <sup>l</sup> | 2.0 (1.0) <sup>m</sup>        |
| HAS-BLED, median (IQR)                               | 2.0 (2.0 to 3.0)       | 2.0 (2.0 to 3.0)       | 2.0 (1.0 to 2.0)       | 2.0 (1.0 to 3.0)       | 2.0 (1.0 to 3.0)              |
| HAS-BLED, 0–2, n (%)                                 | 164 (66.6)             | 173 (71.1)             | 122 (77.7)             | 96 (71.6)              | 555 (71.2)                    |

Patients missing: <sup>a</sup>1, <sup>b</sup>1, <sup>c</sup>2, <sup>d</sup>22, <sup>e</sup>24, <sup>f</sup>22, <sup>g</sup>34, <sup>h</sup>102, <sup>i</sup>129, <sup>j</sup>113, <sup>k</sup>72, <sup>l</sup>101, <sup>m</sup>415

CKD, chronic kidney disease; CHA<sub>2</sub>DS<sub>2</sub>-VAsC, cardiac failure, hypertension, age ≥ 75 (doubled), diabetes, stroke (doubled)-vascular disease, age 65–74 and sex category (female); HAS-BLED: hypertension, abnormal renal/liver function (1 point each), stroke, bleeding history or predisposition, elderly (> 65), drugs/alcohol concomitantly (1 point each)

Table 6. The use of antiplatelet and no treatment versus anticoagulant in relation to baseline characteristics

|                                          | Cohorts 2 to 5       |
|------------------------------------------|----------------------|
| Variable                                 | OR (95% CI)          |
| Gender                                   |                      |
| Female                                   | 1                    |
| Male                                     | 1.09 (0.91 to 1.30)  |
| Age (years)                              |                      |
| < 65                                     | 1                    |
| 65–80                                    | 0.70 (0.54 to 0.90)  |
| 80–85                                    | 0.75 (0.55 to 1.02)  |
| > 85                                     | 0.98 (0.70 to 1.36)  |
| Medical history*                         |                      |
| Congestive heart failure                 | 0.73 (0.52 to 1.03)  |
| Hypertension (history or > 140/90 mm Hg) | 0.89 (0.72 to 1.09)  |
| Diabetes                                 | 0.57 (0.45 to 0.72)  |
| Coronary artery disease                  | 0.84 (0.64 to 1.11)  |
| Vascular disease                         | 0.63 (0.46 to 0.87)  |
| Dementia                                 | 0.72 (0.28 to 1.84)  |
| Moderate-to-severe CKD†                  | 0.92 (0.75 to 1.12)  |
| NSAID usage                              | 5.85 (4.89 to 7.00)  |
| Bleeding                                 | 6.30 (3.90 to 10.18) |
| Previous stroke/TIA/SE                   | 0.47 (0.36 to 0.62)  |
| Smoking                                  |                      |
| Never                                    | 1                    |
| Ex-smoker                                | 0.96 (0.81 to 1.15)  |
| Current smoker                           | 1.04 (0.73 to 1.48)  |
| Cohort                                   |                      |
| 2                                        | 1                    |
| 3                                        | 0.84 (0.67 to 1.05)  |
| 4                                        | 0.55 (0.43 to 0.70)  |
| 5                                        | 0.52 (0.41 to 0.66)  |

### *Antithrombotic therapy use according to risk score*

Figure 2 shows the use of antithrombotic therapy according to CHA<sub>2</sub>DS<sub>2</sub>-VASc score and cohort. Notably, the registry includes a few patients classed as low risk according to the CHA<sub>2</sub>DS<sub>2</sub>-VASc score (i.e. 0 for men, 1 for women) because the determination of risk factors was left to the clinician's judgement and not pre-specified in the protocol. The use of AC increased from C2 to C4 for patients at all levels of stroke risk (low, moderate and high risk), though the increase was highest in patients with a CHA<sub>2</sub>DS<sub>2</sub>-VASc of  $\geq 2$  (C2 56.3%; C4 75.6%). At the same time, there was a decline in the proportion of patients receiving AP only and an increase in the proportion of high-risk patients not receiving any antithrombotic therapy. The overall use of antithrombotic therapy decreased in patients with low risk of stroke from C2 to C4, driven by a decline in the use of AP only from 41.7% in C2 to 11.8% in C4. Also, the proportion of low-risk patients not receiving any antithrombotic therapy increased from 25% to 35.5%. There was a slightly different pattern from C4 to C5; there was a slight decrease in the use of AC in patients at low risk (C4 53.0%, C5 0.0%) and C5 had the largest proportion of low-risk patients not receiving treatment (50.0%). C5 saw an increase in NOACs use across all stroke risk levels, along with a decrease in the use of VKA.

Figure 3 shows the use of antithrombotic therapy according to HAS-BLED score and cohort. There was an increase in AC use over the study period for patients with a HAS-BLED score of 0 to 2; notably, there was a steady increase in AC use in patients with HAS-BLED  $\geq 3$ , peaking at C4 (C2 24.1%, C3 33.7%, C4 66%, C5 62.4%) at the expense of AP use.

### *Main reason anticoagulant was not used in patients with CHA<sub>2</sub>DS<sub>2</sub>-VASc $\geq 2$*

The main reasons why ACs were not used in patients with a CHA<sub>2</sub>DS<sub>2</sub>-VASc score of  $\geq 2$  are shown in Table 7. The top two known reasons were patient refusal and physician's choice. Patient refusal was variable, and in the most recent cohort (C5) it accounted for 11.2% of high-risk patients not receiving AC. There were also some variations in the reasons for physicians choosing not to give high-risk patients ACs across the cohorts; the main reason in C2 was fall risk, whereas the main reason in C5 was bleeding risk.

Table 7. Main reason anticoagulant not used in patients with CHA<sub>2</sub>DS<sub>2</sub>VASc ≥ 2

| Variable                                                              | Cohort 2<br>(N=307)<br>n % | Cohort 3<br>(N =279)<br>n % | Cohort 4<br>(N =171)<br>n % | Cohort 5<br>(N =170)<br>n % |
|-----------------------------------------------------------------------|----------------------------|-----------------------------|-----------------------------|-----------------------------|
| Main reason anticoagulant not used*                                   |                            |                             |                             |                             |
| Already taking anti-platelet drugs for other medical condition        | 30 (9.8)                   | 11 (3.9)                    | 5 (2.9)                     | 9 (5.3)                     |
| Patient refusal                                                       | 44 (14.3)                  | 51 (18.3)                   | 24 (14.0)                   | 19 (11.2)                   |
| Previous bleeding event                                               | 6 (2.0)                    | 5 (1.8)                     | 7 (4.1)                     | 5 (2.9)                     |
| Taking medication contraindicated or cautioned for use with VKA or AC | 1 (0.3)                    | 2 (0.7)                     | 1 (0.6)                     | 2 (1.2)                     |
| Other                                                                 | 113 (36.8)                 | 100 (35.8)                  | 73 (42.7)                   | 79 (46.5)                   |
| Unknown                                                               | 70 (22.8)                  | 72 (25.8)                   | 46 (26.9)                   | 36 (21.2)                   |
| Physician's choice**                                                  | 43 (14.0)                  | 38 (13.6)                   | 15 (8.8)                    | 20 (11.8)                   |
| Bleeding risk                                                         | 8 (18.6)                   | 10 (26.3)                   | 9 (60.0)                    | 13 (65.0)                   |
| Concern over patient compliance                                       | 3 (7.0)                    | 1 (2.6)                     | -                           | -                           |
| Guideline recommendation                                              | 8 (18.6)                   | 6 (15.8)                    | 1 (6.7)                     | 1 (5.0)                     |
| Fall risk                                                             | 13 (30.2)                  | 12 (31.6)                   | 2 (13.3)                    | 5 (25.0)                    |
| Low risk of stroke                                                    | 11 (25.6)                  | 9 (23.7)                    | 3 (20.0)                    | 1 (5.0)                     |

\*Percentages are calculated with the column "N" as denominator;

\*\* Percentages in each category of the Physician's choice are calculated with the available (non-missing) data of the variable as denominator.

## Discussion

These findings from the UK cohort of the GARFIELD-AF registry indicate a progressive improvement in the clinical management of AF, with newly diagnosed at-risk patients with AF more often receiving guideline-recommended therapy. The proportion of patients on AC increased (C2 54.5%, C3 60.1%, C4 72.9%, C5 73.9%) and the increase in the use of AC was mainly in patients with CHA<sub>2</sub>DS<sub>2</sub>-VASc ≥ 2. There was a notable increase in the use of NOACs ± AP (C2 1.3%, C3 8.0%, C4 23.0%, 43.3%), with the main increase in NOAC prescribing being driven by the prescribing of FXa inhibitors; C5 saw a change in VKA prescribing, with NOACs being prescribed in place of VKA. The use of AP only decreased (C2 36.5%, C3 25.3%, C4 11.9%, C5 10.5%); however, the co-prescription of AC + AP did not change much (C2 14%, C3 11.8%, C4 11.4%, C5 11.7%). AC use decreased with bleeding risk, with people with HAS-BLED ≥ 3 less likely to be anticoagulated; nevertheless, use of AC in patients with HAS-BLED ≥ 3 increased notably from 24% in C2 to the peak of 66% in C4.

In addition, there was a decline in AP use in patients at low risk, with a corresponding increase in the proportion of patients in this category not receiving any antithrombotic therapy. However, an important proportion of low-risk patients received AC over the period, with 50% of low-risk patients receiving AC in the most recent cohort. For patients with a CHA<sub>2</sub>DS<sub>2</sub>-VASc score of 1, there was a notable increase in AC prescribing from C2 to C5 and a steep decline in the use of AP only.

Our findings are, to a large extent, consistent with changes in AF management guidelines. In the UK, NICE guidelines up until 2014 recommend that high-risk patients should be on warfarin, those at moderate risk should receive warfarin or aspirin, and low-risk patients should not be on warfarin (but could be prescribed aspirin)<sup>17</sup>. The current (2014) guidelines no longer recommend aspirin; patients should receive anticoagulation or not.<sup>5</sup> The notable increase in AC use and corresponding decline in AP use fall within the guidelines; our data suggests patients that would have been given



1  
2  
3 aspirin in earlier cohorts are now given AC, also that the increase in AC use is potentially driven by  
4 the availability of NOACs.  
5

6 This is the first UK study to describe the reasons for not anticoagulating real-world patients in  
7 relation to stroke risk, and the findings corroborate our deduction that guidelines have influenced  
8 clinical practice. The data suggests that patient refusal (11.2% for high-risk patients in the most  
9 recent cohort) may be the main patient factor affecting rates of anticoagulation. There is little UK  
10 evidence on AC treatment rates in the post-VKA only era; nevertheless, co-prescription of ACs and  
11 APs (15.1%) is higher than reported by Kassianos et al<sup>11</sup> (11% initiated on ACs plus APs within 12  
12 weeks of diagnosis of AF).  
13  
14

#### 15 *Strengths and limitations*

16 This study describes real-world clinical practice in the UK for treatment initiated at AF diagnosis in  
17 patients with AF and at least one risk factor for stroke. Recruiting patients from primary care  
18 captures patients regardless of the care setting of diagnosis, therefore providing a pool of patients  
19 representative of UK patients diagnosed with AF. Study sites sought to recruit consecutive eligible  
20 patients, thereby reducing the risk of selection bias. In addition, the 6-week period between  
21 diagnosis and enrolment minimises the risk of excluding deceased patients.  
22  
23  
24

25 The study is subject to the limitations inherent to observational studies, although efforts were made  
26 to standardise definitions and reduce missing data. Ethical approval for the study does not cover  
27 patients without the capacity to consent. The data on low-risk patients' needs to be interpreted with  
28 caution due to the low numbers in the UK sample. Comorbidities are likely confounders in treatment  
29 strategies; however, these were not comprehensively incorporated in this analysis.  
30  
31  
32

#### 33 *Comparison with global GARFIELD-AF data*

34 Evolving antithrombotic treatment patterns up to C4 for the global GARFIELD-AF population have  
35 previously been published<sup>18</sup>; our comparison is in relation to UK patients enrolled during the  
36 corresponding recruitment period (C2 to C4). Globally, a total of 34,170 patients were enrolled into  
37 C2 to C4 in 34 countries. UK patients were older than patients in the global study: mean age of 74.7  
38 years compared with 69.9 years in the global study<sup>18</sup>. UK patients had less heart failure (7.6% vs  
39 19.8%), higher prevalence of CKD (26.5% vs 10.3%), but similar rates of CAD and ACS. UK patients  
40 had a higher proportion of those with CHA<sub>2</sub>DS<sub>2</sub>VASc score of 0–1 (10.5% vs 14.7%) and a lower  
41 proportion with HAS-BLED of 0–2 (81.3% vs 88.7%).  
42  
43  
44  
45

46 Despite starting from a lower baseline, the use of AC in the UK in the most recent cohort is  
47 comparable to that in the global study (UK 54.7% to 73.1%, global 62.1% to 71.1%)<sup>18</sup>. Nevertheless,  
48 the uptake of NOACs is higher in global study, with NOACs being prescribed in place of VKA, whereas  
49 VKA prescribing in the UK hardly changed up until C4 (NOACs use in C4: global 37.2%, UK 22.7%). In  
50 C5 however, UK data illustrates a decline in VKA prescribing matched by an increase in NOACs use.  
51 As in the UK population, over-treatment of patients at low risk of stroke was observed in the global  
52 population, and over 50% of low-risk patients in C4 received AC. This may be due to clinicians'  
53 perception of stroke risk as all participants were deemed by the recruiting clinician to have an  
54 investigator determined risk factor for stroke. Co-prescription of AC + AP was also an issue in the  
55 global population, with 6.8% affected in C4; however, the UK seems to have responded better to the  
56  
57  
58  
59  
60

1  
2  
3 renunciation of AP only as a treatment option: in C4, 11.7% of high-risk UK patients were given AP  
4 only compared with 16.0% in the global population.  
5

6 *Implications for practice*  
7

8 These data indicate progressive concordance with evidence-based guidelines and clinical practice in  
9 the UK for patients newly diagnosed with AF. More UK patients are receiving guideline-  
10 recommended therapy; this is significant, given the increasing prevalence of AF in the UK. Although  
11 the proportion of high-risk patients taking an AC in most recent cohort is unprecedented, about a  
12 tenth of high-risk patients still do not receive AC therapy, indicating that there is further scope for  
13 improvement. It is important to elucidate the reasons why some high-risk patients do not receive  
14 anticoagulation; in particular, the reasons and circumstances for patient refusal need to be explored  
15 (and documented). An important proportion of low-risk patients are still receiving AC despite the  
16 proven capability of the CHA<sub>2</sub>DS<sub>2</sub>-VASc score to identify patients at truly low risk. Further attention  
17 to patients in this category will be beneficial. Also, patients are being co-prescribed ACs and aspirin  
18 (11.7% of high-risk patients in most recent cohort), a combination that is rarely indicated since it  
19 increases bleeding risk by over 50%; it might be worth exploring the rationale for this in future  
20 research.  
21  
22  
23  
24

25 The clinical management of patients with AF is evolving and treatment outcomes will become  
26 clearer with time. GARFIELD-AF provides real-world data on evolving treatment patterns and further  
27 data will provide insight into corresponding treatment outcomes.  
28  
29  
30  
31  
32  
33  
34  
35  
36  
37  
38  
39  
40  
41  
42  
43  
44  
45  
46  
47  
48  
49  
50  
51  
52  
53  
54  
55  
56  
57  
58  
59  
60

### **Funding**

The GARFIELD-AF registry is sponsored by the Thrombosis Research Institute, London, UK. Funding of the registry is provided through an educational research grant from Bayer AG (Berlin, Germany).

### **Ethical approval**

The UK has received ethical approval from the South East London Research Ethics Committee 5 (REC 5) on 29 September 2010; REC reference 10/H0805/48.

### **Copyright for publication**

The Corresponding Author has the right to grant on behalf of all authors and does grant on behalf of all authors, a worldwide licence to the Publishers and its licensees in perpetuity, in all forms, formats and media (whether known now or created in the future), to i) publish, reproduce, distribute, display and store the Contribution, ii) translate the Contribution into other languages, create adaptations, reprints, include within collections and create summaries, extracts and/or, abstracts of the Contribution, iii) create any other derivative work(s) based on the Contribution, iv) to exploit all subsidiary rights in the Contribution, v) the inclusion of electronic links from the Contribution to third party material where-ever it may be located; and, vi) licence any third party to do any or all of the above.

### **Competing interests**

Mrs Apenteng has nothing to disclose; Dr Gao has nothing to disclose; Professor Hobbs reports personal fees and other from BMS/Pfizer, personal fees and other from BI, personal fees and other from Bayer, outside the submitted work. Professor Fitzmaurice has nothing to disclose.

### **Authors' contributions**

PNA contributed to the acquisition, analysis and interpretation of data for the study, and drafted the manuscript. HG contributed to the analysis and interpretation of the data and revised the work critically for intellectual content. FDRH contributed to the interpretation of the data and revised the work critically for intellectual content. DAF contributed to the acquisition, analysis and interpretation of the data and revised the work critically for intellectual content. DAF is also the Principal Investigator and guarantor for the UK study. All authors approved the final version of the manuscript, and are accountable for all aspects of the work.

**Transparency declaration**

The corresponding author affirms that this manuscript is an honest, accurate and transparent account of the study being reported; that no important aspects of the study have been omitted; and that any discrepancies from the study as planned have been explained.

**Data sharing statement**

No additional data available.

**Acknowledgements**

We thank the physicians, nurses and patients involved in the GARFIELD-AF registry. SAS programming support was provided by Madhusudana Rao (Thrombosis Research Institute, London, UK). Editorial support was provided by Emily Chu (Thrombosis Research Institute, London, UK).

## References

1. Wolf P. Atrial fibrillation as an independent risk factor for stroke: the Framingham Study. *Stroke* 1991;**8**(22):983-88.
2. Wolf P, Abbott R, Kannel W. Atrial fibrillation: a major contributor to stroke in the elderly. The Framingham Study. *Arch Intern Med* 1987;**147**(9):1561-64.
3. Jorgensen H, H N, J R, et al. Acute Stroke With Atrial Fibrillation. The Copenhagen Stroke Study. *Stroke* 1996;**27**(10):1765-69.
4. Camm AJ, Kirchhof P, Lip GYH, et al. Guidelines for the management of atrial fibrillation. The Task Force for the Management of Atrial Fibrillation of the European Society of Cardiology (ESC) 2010;**31**(19):2369-429.
5. National Institute for Health and Clinical Excellence (NICE). Nice Clinical Guideline 180; Atrial Fibrillation: the management of atrial fibrillation. [2014] <https://www.nice.org.uk/guidance/cg180>
6. Ogilvie IM, Newton N, Welner SA, et al. Underuse of oral anticoagulants in atrial fibrillation: a systematic review. *The American Journal of Medicine* 2010;**123**(7):638-45.
7. Baczek VL, Chen WT, Kluger J, et al. Predictors of warfarin use in atrial fibrillation in the United States: a systematic review and meta-analysis. *BMC Family Practice* 2012;**13**(1):5.
8. Mohammed MA, Marshall T, Nirantharakumar K, et al. Patterns of warfarin use in subgroups of patients with atrial fibrillation: a cross-sectional analysis of 430 general practices in the United Kingdom. *PloS one* 2013;**8**(5):e61979.
9. Holt TA, Hunter TD, Gunnarsson C, et al. Risk of stroke and oral anticoagulant use in atrial fibrillation: a cross-sectional survey. *Br J Gen Pract* 2012;**62**(603):e710-e17.
10. Cowan C, Healcon R, Robson I, et al. The use of anticoagulants in the management of atrial fibrillation among general practices in England. *Heart* 2013:heartjnl-2012-303472.
11. Kassianos G, Arden C, Hogan S, et al. Current management of atrial fibrillation: an observational study in NHS primary care. *BMJ open* 2013;**3**(11):e003004.
12. Kakkar AK, Mueller I, Bassand J-P, et al. International longitudinal registry of patients with atrial fibrillation at risk of stroke: Global Anticoagulant Registry in the FIELD (GARFIELD). *American heart journal* 2012;**163**(1):13-19. e1.
13. Apenteng PN, Murray ET, Holder R, et al. An international longitudinal registry of patients with atrial fibrillation at risk of stroke (GARFIELD): the UK protocol. *BMC cardiovascular disorders* 2013;**13**(1):31.
14. National Kidney Foundation (NKF). K/DOQI clinical practice guidelines for chronic kidney disease: evaluation, classification, and stratification. *American journal of kidney diseases: the official journal of the National Kidney Foundation* 2002;**39**(2 Suppl 1):S1.
15. Van Buuren S. Multiple imputation of discrete and continuous data by fully conditional specification. *Statistical methods in medical research* 2007;**16**(3):219-42.
16. Raghunathan TE, Lepkowski JM, Van Hoewyk J, et al. A multivariate technique for multiply imputing missing values using a sequence of regression models. *Survey methodology* 2001;**27**(1):85-96.
17. National Institute for Health and Clinical Excellence (NICE). Clinical Guideline CG36 - Atrial Fibrillation: The management of atrial fibrillation. [2006] <http://www.nice.org.uk/CG36>.
18. Camm AJ, Accetta G, Ambrosio G, et al. Evolving antithrombotic treatment patterns for patients with newly diagnosed atrial fibrillation. *Heart* 2016:heartjnl-2016-309832.

1  
2  
3  
4  
5  
6  
7  
8  
9  
10  
11  
12  
13  
14  
15  
16  
17  
18  
19  
20  
21  
22  
23  
24  
25  
26  
27  
28  
29  
30  
31  
32  
33  
34  
35  
36  
37  
38  
39  
40  
41  
42  
43  
44  
45  
46  
47  
48  
49  
50  
51  
52  
53  
54  
55  
56  
57  
58  
59  
60

**Figure 1. Antithrombotic treatment at diagnosis by cohort**

**Figure 2. Antithrombotic treatment at diagnosis by CHA<sub>2</sub>DS<sub>2</sub>-VASc and cohort, for patients with a score of 0, 1 and  $\geq 2$**

**Figure 3. Antithrombotic treatment at diagnosis by HAS-BLED score and cohort, for patients with a score of 0–2 and  $\geq 3$**

For peer review only

1  
2  
3  
4  
5  
6  
7  
8  
9  
10  
11  
12  
13  
14  
15  
16  
17  
18  
19  
20  
21  
22  
23  
24  
25  
26  
27  
28  
29  
30  
31  
32  
33  
34  
35  
36  
37  
38  
39  
40  
41  
42  
43  
44  
45  
46  
47  
48  
49  
50  
51  
52  
53  
54  
55  
56  
57  
58  
59  
60

Figure 1. Antithrombotic treatment at diagnosis by cohort

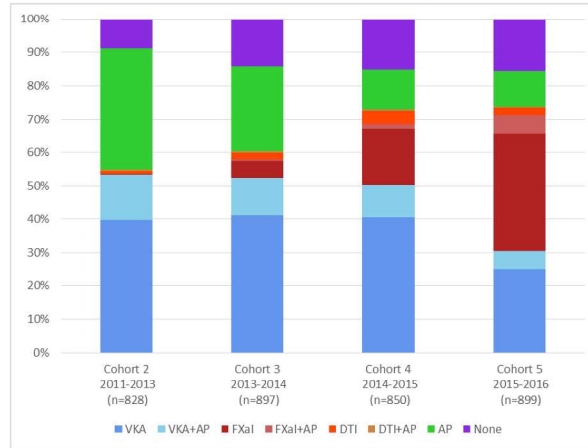

VKA, vitamin K antagonist; AP, antiplatelet; FXaI, factor Xa inhibitor; DTI direct thrombin inhibitor.

Figure 1. Antithrombotic treatment at diagnosis by cohort

209x297mm (300 x 300 DPI)

1  
2  
3  
4  
5  
6  
7  
8  
9  
10  
11  
12  
13  
14  
15  
16  
17  
18  
19  
20  
21  
22  
23  
24  
25  
26  
27  
28  
29  
30  
31  
32  
33  
34  
35  
36  
37  
38  
39  
40  
41  
42  
43  
44  
45  
46  
47  
48  
49  
50  
51  
52  
53  
54  
55  
56  
57  
58  
59  
60

Figure 2. Antithrombotic treatment at diagnosis by CHA<sub>2</sub>DS<sub>2</sub>-VASc and cohort, for patients with a score of 0, 1 and ≥ 2

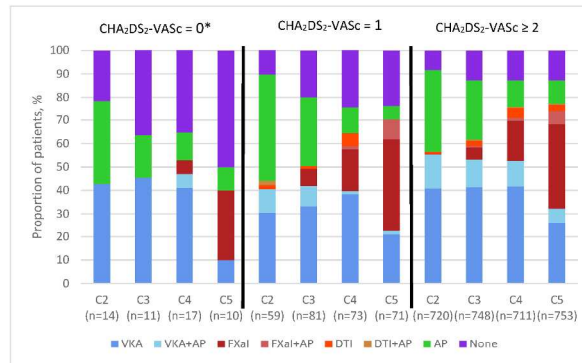

\* includes women with no other risk factors

The total population represented by n excludes unknowns. Patients with missing CHA<sub>2</sub>DS<sub>2</sub>-VASc score: C2, 35; C3, 58; C4, 49; C5, 65. AP, antiplatelet; CHA<sub>2</sub>DS<sub>2</sub>-VASc, cardiac failure, hypertension, age ≥75 (doubled), diabetes, stroke (doubled)-vascular disease, age 65–74 and sex category (female); DTI, direct thrombin inhibitor; FXaI, factor Xa inhibitor; VKA, vitamin K antagonist.

Figure 2. Antithrombotic therapy according to CHA<sub>2</sub>DS<sub>2</sub>VASc score

210x297mm (300 x 300 DPI)



1  
2  
3  
4  
5  
6  
7  
8  
9  
10  
11  
12  
13  
14  
15  
16  
17  
18  
19  
20  
21  
22  
23  
24  
25  
26  
27  
28  
29  
30  
31  
32  
33  
34  
35  
36  
37  
38  
39  
40  
41  
42  
43  
44  
45  
46  
47  
48  
49  
50  
51  
52  
53  
54  
55  
56  
57  
58  
59  
60

Figure 3. Antithrombotic treatment at diagnosis by HAS-BLED score and cohort, for patients with a score of 0-2 and ≥3

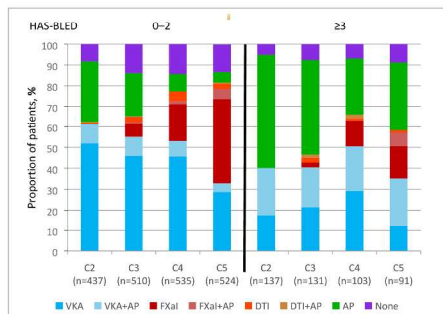

VKA, vitamin K antagonist; AP, antiplatelet; FXaI, factor Xa inhibitor; DTI direct thrombin inhibitor.

Figure 3. Antithrombotic treatment at diagnosis by HAS-BLED score by cohort for patients with a score of 0-2 and 3 or more

297x209mm (300 x 300 DPI)

Review only

## Appendix 1. UK GARFIELD Investigators

1  
2  
3 D Fitzmaurice, W Murdoch, N Chauhan, D Goodwin, L Lumley, R Patel, P Saunders, B Wong, A  
4 Cameron, P Saunders, N Patel, P Jhittay, A Ross, M Kainth, K Ladha, K Douglas, G Pickavance, J  
5 McDonnell, L Handscombe, T Gooding, H Wagner, D Cumberlidge, C Bradshaw, C Bromham, K Jones,  
6 S Suryani, R Coates, B Sarai, W Willcock, S Sircar, J Cairns, A Gilliand, R Bilas, P Hutchinson, A  
7 Wakeman, M Stokes, G Kirby, B Vishwanathan, N Bird, P Evans, M Clark, J Bisatt, J Litchfield, E  
8 Fisher, T Fooks, R Kelsall, N Paul, E Alborough, M Aziz, C Ramesh, P Wilson, S Franklin, S Fairhead, J  
9 Thompson, H Chowan, G Taylor, J Wakeling, D Tragen, M Parfitt, C Seamark, C Paul, M Richardson, A  
10 Jefferies, H Sharp, H Jones, C Giles, M Bramley, P Williams, J Aldegather, S Wetherell, W Lumb, P  
11 Evans, F Scouller, N Macey, S Rogers, Y Stipp, R West, P Pinney, P Wadeson, J Matthews, P Pandya, A  
12 Gallagher, T Railton, E Davies, J McClure, M Jacobs, C Hutton, R Thompson, B Sinha, K Butter, S  
13 Barrow, H Little, D Russell, U Choudhary, I Haq, P Ainsworth, C Jones, P Weeks, J Eden, L Gibbons, J  
14 Glencross, A MacLeod, K Poland, C Mulolland, A Warke, P Conn, D Burns, R Smith, R Kamath, J  
15 Webster, I Hodgins, S Vercoe, P Roome, H Pinnock, J Patel, A Ali, N Hart, R Davies, E Stuart, C Neden,  
16 M Danielsen, P Sharma, S Galloway, C Hawkins, R Oliver, M Aylward, M Pattni, G Irvine, S Ahmad, C  
17 Rothwell, F Choudhary, S Khalaque, S Short, S Peters, W Coulson, N Roberts, A Butler, S Coates, B  
18 Ward, D Jackson, S Walton, D Shepherd, T Wong, M Boon, M Deacon, D Cornelius, S Davies, B  
19 Frankel, N Hargreaves, H Choi, J Sumner, T Myhill, S Estifanos, D Geatch, J Wilkinson, R Veale, K  
20 Forshaw, R Hirst, K Zaman, C Liley, R Wastling, P McEleny, A Beattie, P Cooke, M Wong, M Pugsley, C  
21 Dooleniya, G Rogers, J Bennett, P Jacobs, R Muvva, M Adam, R Fox, N Thomas, S Cartwright, R  
22 Reed, S Randfield, C A'Court, A Flynn, A Halpin, S Suryani, S Dobson, L Lomax, M Nadaph, I Munro, J  
23 Goram, H Stoddart, P Simmons, J Shewring, E Bowen-Simpkins, M Rickenbach, P Jacobs  
24  
25  
26  
27  
28  
29  
30  
31  
32  
33  
34  
35  
36  
37  
38  
39  
40  
41  
42  
43  
44  
45  
46  
47  
48  
49  
50  
51  
52  
53  
54  
55  
56  
57  
58  
59  
60

STROBE Statement—Checklist of items that should be included in reports of *cohort studies*

|                              | Item No | Recommendation                                                                                                                                                                                                                                                                                                                                                                            |
|------------------------------|---------|-------------------------------------------------------------------------------------------------------------------------------------------------------------------------------------------------------------------------------------------------------------------------------------------------------------------------------------------------------------------------------------------|
| <b>Title and abstract</b>    | 1       | (a) Indicate the study's design with a commonly used term in the title or the abstract<br><b>Page 1</b><br>(b) Provide in the abstract an informative and balanced summary of what was done and what was found <b>Page 2</b>                                                                                                                                                              |
| <b>Introduction</b>          |         |                                                                                                                                                                                                                                                                                                                                                                                           |
| Background/rationale         | 2       | Explain the scientific background and rationale for the investigation being reported<br><b>Page 4</b>                                                                                                                                                                                                                                                                                     |
| Objectives                   | 3       | State specific objectives, including any prespecified hypotheses <b>Page 4-5</b>                                                                                                                                                                                                                                                                                                          |
| <b>Methods</b>               |         |                                                                                                                                                                                                                                                                                                                                                                                           |
| Study design                 | 4       | Present key elements of study design early in the paper <b>Page 4-5</b>                                                                                                                                                                                                                                                                                                                   |
| Setting                      | 5       | Describe the setting, locations, and relevant dates, including periods of recruitment, exposure, follow-up, and data collection <b>Page 5</b>                                                                                                                                                                                                                                             |
| Participants                 | 6       | (a) Give the eligibility criteria, and the sources and methods of selection of participants. Describe methods of follow-up <b>Page 5</b><br>(b) For matched studies, give matching criteria and number of exposed and unexposed <b>N/A</b>                                                                                                                                                |
| Variables                    | 7       | Clearly define all outcomes, exposures, predictors, potential confounders, and effect modifiers. Give diagnostic criteria, if applicable <b>Page 5</b>                                                                                                                                                                                                                                    |
| Data sources/<br>measurement | 8*      | For each variable of interest, give sources of data and details of methods of assessment (measurement). Describe comparability of assessment methods if there is more than one group <b>Page 5</b>                                                                                                                                                                                        |
| Bias                         | 9       | Describe any efforts to address potential sources of bias <b>Page 6</b>                                                                                                                                                                                                                                                                                                                   |
| Study size                   | 10      | Explain how the study size was arrived at                                                                                                                                                                                                                                                                                                                                                 |
| Quantitative variables       | 11      | Explain how quantitative variables were handled in the analyses. If applicable, describe which groupings were chosen and why <b>Page 5-6</b>                                                                                                                                                                                                                                              |
| Statistical methods          | 12      | (a) Describe all statistical methods, including those used to control for confounding<br><b>Page 6</b><br>(b) Describe any methods used to examine subgroups and interactions <b>Page 6</b><br>(c) Explain how missing data were addressed <b>Page 6</b><br>(d) If applicable, explain how loss to follow-up was addressed <b>N/A</b><br>(e) Describe any sensitivity analyses <b>N/A</b> |
| <b>Results</b>               |         |                                                                                                                                                                                                                                                                                                                                                                                           |
| Participants                 | 13*     | (a) Report numbers of individuals at each stage of study—eg numbers potentially eligible, examined for eligibility, confirmed eligible, included in the study, completing follow-up, and analysed <b>N/A</b><br>(b) Give reasons for non-participation at each stage<br>(c) Consider use of a flow diagram                                                                                |
| Descriptive data             | 14*     | (a) Give characteristics of study participants (eg demographic, clinical, social) and information on exposures and potential confounders <b>Page 6, Table 1</b><br>(b) Indicate number of participants with missing data for each variable of interest<br><b>Tables</b><br>(c) Summarise follow-up time (eg, average and total amount) <b>N/A</b>                                         |
| Outcome data                 | 15*     | Report numbers of outcome events or summary measures over time <b>N/A</b>                                                                                                                                                                                                                                                                                                                 |
| Main results                 | 16      | (a) Give unadjusted estimates and, if applicable, confounder-adjusted estimates and their precision (eg, 95% confidence interval). Make clear which confounders were                                                                                                                                                                                                                      |

|    |                          |                                                                                           |
|----|--------------------------|-------------------------------------------------------------------------------------------|
| 1  |                          | adjusted for and why they were included <b>Page 6-8</b>                                   |
| 2  |                          | (b) Report category boundaries when continuous variables were categorized <b>Page 6-</b>  |
| 3  |                          | <b>8</b>                                                                                  |
| 4  |                          | (c) If relevant, consider translating estimates of relative risk into absolute risk for a |
| 5  |                          | meaningful time period <b>N/A</b>                                                         |
| 6  |                          |                                                                                           |
| 7  | Other analyses           | 17 Report other analyses done—eg analyses of subgroups and interactions, and              |
| 8  |                          | sensitivity analyses <b>N/A</b>                                                           |
| 9  |                          |                                                                                           |
| 10 | <b>Discussion</b>        |                                                                                           |
| 11 | Key results              | 18 Summarise key results with reference to study objectives <b>Page 8</b>                 |
| 12 | Limitations              | 19 Discuss limitations of the study, taking into account sources of potential bias or     |
| 13 |                          | imprecision. Discuss both direction and magnitude of any potential bias <b>Page 9</b>     |
| 14 |                          |                                                                                           |
| 15 | Interpretation           | 20 Give a cautious overall interpretation of results considering objectives, limitations, |
| 16 |                          | multiplicity of analyses, results from similar studies, and other relevant evidence       |
| 17 |                          | <b>Page 9-10</b>                                                                          |
| 18 |                          |                                                                                           |
| 19 | Generalisability         | 21 Discuss the generalisability (external validity) of the study results <b>Page 9</b>    |
| 20 |                          |                                                                                           |
| 21 | <b>Other information</b> |                                                                                           |
| 22 | Funding                  | 22 Give the source of funding and the role of the funders for the present study and, if   |
| 23 |                          | applicable, for the original study on which the present article is based <b>Page 11</b>   |
| 24 |                          |                                                                                           |
| 25 |                          |                                                                                           |
| 26 |                          |                                                                                           |
| 27 |                          |                                                                                           |
| 28 |                          |                                                                                           |
| 29 |                          |                                                                                           |
| 30 |                          |                                                                                           |
| 31 |                          |                                                                                           |
| 32 |                          |                                                                                           |
| 33 |                          |                                                                                           |
| 34 |                          |                                                                                           |
| 35 |                          |                                                                                           |
| 36 |                          |                                                                                           |
| 37 |                          |                                                                                           |
| 38 |                          |                                                                                           |
| 39 |                          |                                                                                           |
| 40 |                          |                                                                                           |
| 41 |                          |                                                                                           |
| 42 |                          |                                                                                           |
| 43 |                          |                                                                                           |
| 44 |                          |                                                                                           |
| 45 |                          |                                                                                           |
| 46 |                          |                                                                                           |
| 47 |                          |                                                                                           |
| 48 |                          |                                                                                           |
| 49 |                          |                                                                                           |
| 50 |                          |                                                                                           |
| 51 |                          |                                                                                           |
| 52 |                          |                                                                                           |
| 53 |                          |                                                                                           |
| 54 |                          |                                                                                           |
| 55 |                          |                                                                                           |
| 56 |                          |                                                                                           |
| 57 |                          |                                                                                           |
| 58 |                          |                                                                                           |
| 59 |                          |                                                                                           |
| 60 |                          |                                                                                           |
